# Supplementary material for: Electronic spectra of ytterbium fluoride from relativistic electronic structure calculations
Source: Royal Society of Chemistry journal article supplement (doi:10.1039/d1cp03701c), 2021-01-01
Supplement: d1cp03701c1.pdf [file d1cp03701c1.pdf]

# Supplementary Information: Electronic Spectra of Ytterbium Fluoride from Relativistic Electronic Structure Calculations

Johann V. Pototschnig,<sup>\*,†</sup> Kenneth G. Dyall,<sup>\*,‡</sup> Lucas Visscher,<sup>\*,†</sup> and André  
Severo Pereira Gomes<sup>\*,¶</sup>

<sup>†</sup>*Amsterdam Center for Multiscale Modeling, Department of Theoretical Chemistry, Faculty  
of Sciences, VU University Amsterdam, De Boelelaan 1083, NL-1081 HV Amsterdam, The  
Netherlands*

<sup>‡</sup>*Dirac Solutions, 10527 NW Lost Park Drive, Portland, OR 97229, U.S.A.*

<sup>¶</sup>*Université de Lille, CNRS, UMR 8523 – PhLAM – Physique des Lasers, Atomes et  
Molécules, F-59000 Lille, France*

E-mail: [j.v.pototschnig@vu.nl](mailto:j.v.pototschnig@vu.nl); [diracsolutions@gmail.com](mailto:diracsolutions@gmail.com); [l.visscher@vu.nl](mailto:l.visscher@vu.nl);  
[andre.gomes@univ-lille.fr](mailto:andre.gomes@univ-lille.fr)

This is the supplementary information for the manuscript entitled: "Electronic Spectra of Ytterbium Fluoride from Relativistic Electronic Structure Calculations" by J. V. Pototschnig, K. G. Dyall, L. Visscher and A. S. P. Gomes.

In section 1 a closer look is taken at the orbitals and their energies for the two different references, either with a closed or open f-shell. Orbital energies for different diatomic distances are depicted alongside orbitals for the YbF diatomic. Section 2 contains additional results obtained for Kramers restricted configuration interaction. Firstly, we compare results obtained with the X2C-AMFI code to full 4-component computations. Next, poten-

tial energy curves, including spectroscopic parameters, and dipole moments—both transition dipole moments (TDM) and permanent electric dipole moments (PEDM)—for different basis set sizes are presented. Subsequently, the problem of the relative position of the  $f^{13}$  and  $f^{14}$  states is addressed and its basis set dependence. Lastly, transition dipole moments are listed. Section 3 contains the potential energy curves and spectroscopic parameters for different basis set sizes applying the Fock space coupled cluster method and spectroscopic parameters for the states after adiabatic mixing as presented in the main text. An extended list of equation-of-motion coupled cluster transition energies for the  $\text{Yb}^+$  is listed in section 4. This section also contains EOM-CCSD potential energy curves for different basis set sizes. Finally, in section 6 Franck-Condon factors for potentials stemming from the different methods are depicted and compared. Additional figures (orbital pictures, basis set convergence) can be found in the first version of this manuscript on arXiv.<sup>1</sup>

# 1 Orbitals

## 1.1 Orbital energies

In this part the orbital energies obtained by AOC-SCF for several internuclear separations are shown.

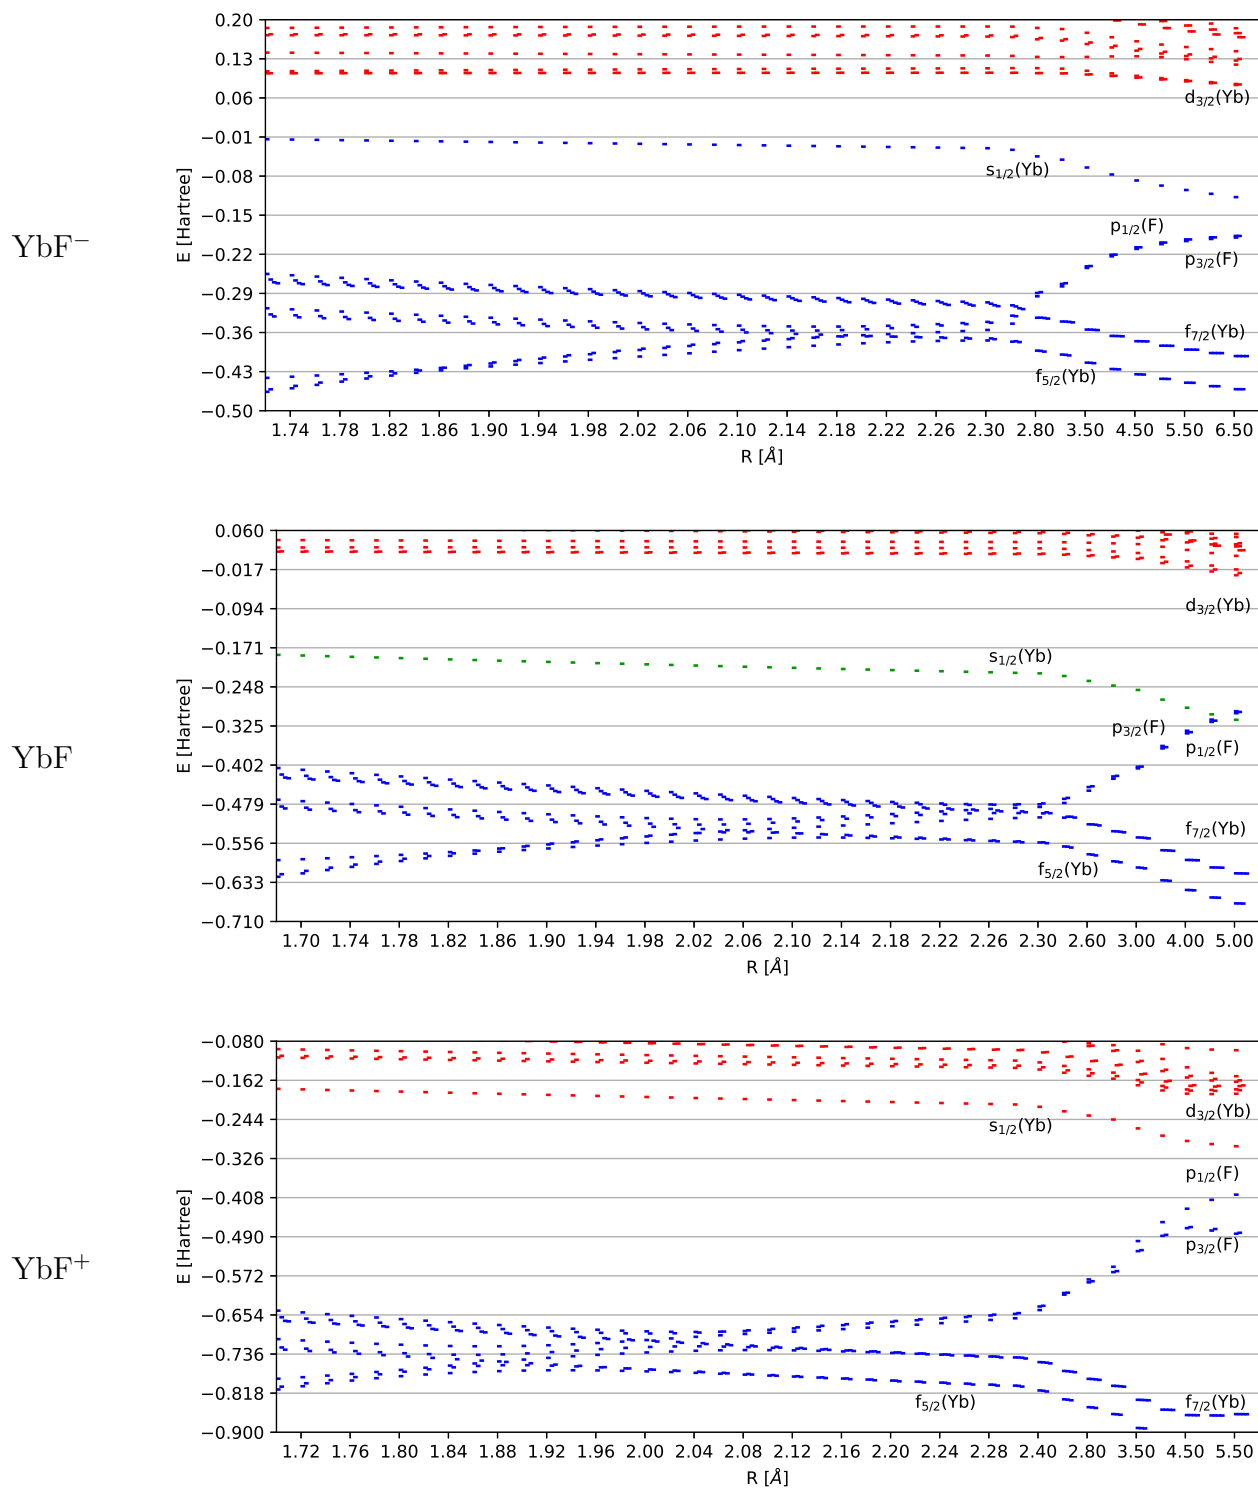

Figure S1: Orbital energies for different bond distances. Blue, green, and red are occupied, partially filled, and virtual orbitals, respectively.

## 1.2 Diatomic orbitals - equilibrium distance

This section contains orbitals of the YbF diatomic for a internuclear distance close to the ground state equilibrium one.

Table S1: Orbitals obtained from an AOC-SCF computations either with a fully occupied ( $f^{14}$ ) or single hole ( $f^{13}$ ) f-shell for YbF with a distance of 2 Å. For each orbital we list the orbital energy according to a Koopman's definition.<sup>2,3</sup> The contributing atomic orbitals contributing have been given in the first column.

| designation                                         | $f^{14}$                                                                            | $f^{13}$                                                                              |
|-----------------------------------------------------|-------------------------------------------------------------------------------------|---------------------------------------------------------------------------------------|
|                                                     | -2.475129022                                                                        | -2.606565796                                                                          |
| 25<br>$5s_{1/2}(\text{Yb})$                         |   |   |
|                                                     | -1.511889433                                                                        | -1.611193447                                                                          |
| 26<br>$5p_{1/2}(\text{Yb})$<br>$2s_{1/2}(\text{F})$ |  |  |

*Continued on next page*

Table S1 – *Continued from previous page*

| designation                                         | $f^{14}$                                                                            | $f^{13}$                                                                              |
|-----------------------------------------------------|-------------------------------------------------------------------------------------|---------------------------------------------------------------------------------------|
|                                                     | -1.435750686                                                                        | -1.539604687                                                                          |
| 27<br>$5p_{1/2}(\text{Yb})$<br>$2s_{1/2}(\text{F})$ | 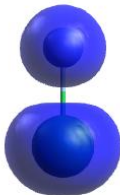   |    |
|                                                     |    |      |
|                                                     | -1.229656975                                                                        | -1.323836039                                                                          |
| 28<br>$5p_{3/2}(\text{Yb})$                         |  |  |
|                                                     |  |    |

*Continued on next page*

Table S1 – *Continued from previous page*

| designation                                                 | $f^{14}$                                                                            | $f^{13}$                                                                              |
|-------------------------------------------------------------|-------------------------------------------------------------------------------------|---------------------------------------------------------------------------------------|
|                                                             | -1.210630046                                                                        | -1.311522305                                                                          |
| 29<br>$5p_{3/2}(\text{Yb})$                                 |    |    |
|                                                             | -0.594742161                                                                        | -0.774346397                                                                          |
| 30<br>$4f_{5/2,7/2}(\text{Yb})$<br>$2p_{1/2,3/2}(\text{F})$ |  |  |

*Continued on next page*

Table S1 – *Continued from previous page*

| designation               | $f^{14}$                                                                            | $f^{13}$                                                                              |
|---------------------------|-------------------------------------------------------------------------------------|---------------------------------------------------------------------------------------|
|                           | -0.584034308                                                                        | -0.773626615                                                                          |
| 31                        |                                                                                     |                                                                                       |
| $4f_{5/2,7/2}(\text{Yb})$ | 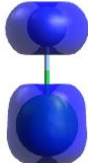   |    |
| $2p_{1/2,3/2}(\text{F})$  |    |    |
|                           |    |      |
|                           | -0.582311174                                                                        | -0.772523010                                                                          |
| 32                        |                                                                                     |                                                                                       |
| $4f_{5/2,7/2}(\text{Yb})$ |  |  |
| $2p_{1/2,3/2}(\text{F})$  |  |  |
|                           |  |    |

*Continued on next page*

Table S1 – *Continued from previous page*

| designation                                                 | $f^{14}$                                                                            | $f^{13}$                                                                              |
|-------------------------------------------------------------|-------------------------------------------------------------------------------------|---------------------------------------------------------------------------------------|
|                                                             | -0.574792083                                                                        | -0.719689709                                                                          |
| 33<br>$4f_{5/2,7/2}(\text{Yb})$<br>$2p_{1/2,3/2}(\text{F})$ | 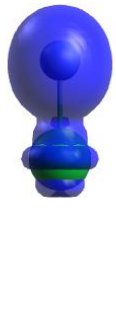   |    |
|                                                             | -0.561976545                                                                        | -0.715455417                                                                          |
| 34<br>$4f_{5/2,7/2}(\text{Yb})$<br>$2p_{1/2,3/2}(\text{F})$ |  |  |

*Continued on next page*



Table S1 – *Continued from previous page*

| designation               | $f^{14}$                                                                            | $f^{13}$                                                                              |
|---------------------------|-------------------------------------------------------------------------------------|---------------------------------------------------------------------------------------|
|                           | -0.55211333                                                                         | -0.715038003                                                                          |
| 35                        |    |    |
| $4f_{5/2,7/2}(\text{Yb})$ |                                                                                     |                                                                                       |
| $2p_{1/2,3/2}(\text{F})$  |                                                                                     |                                                                                       |
|                           | -0.523207455                                                                        | -0.713718461                                                                          |
| 36                        |  |  |
| $4f_{5/2,7/2}(\text{Yb})$ |                                                                                     |                                                                                       |
| $2p_{1/2,3/2}(\text{F})$  |                                                                                     |                                                                                       |

*Continued on next page*

Table S1 – *Continued from previous page*

| designation               | $f^{14}$                                                                            | $f^{13}$                                                                              |
|---------------------------|-------------------------------------------------------------------------------------|---------------------------------------------------------------------------------------|
|                           | -0.521323830                                                                        | -0.653507491                                                                          |
| 37                        |                                                                                     |                                                                                       |
| $4f_{5/2,7/2}(\text{Yb})$ | 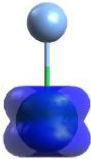   |    |
| $2p_{1/2,3/2}(\text{F})$  |    |    |
|                           | -0.515413462                                                                        | -0.644769626                                                                          |
| 38                        |                                                                                     |                                                                                       |
| $4f_{5/2,7/2}(\text{Yb})$ |  |  |
| $2p_{1/2,3/2}(\text{F})$  |  |  |

*Continued on next page*

Table S1 – *Continued from previous page*

| designation                                                 | $f^{14}$                                                                            | $f^{13}$                                                                             |
|-------------------------------------------------------------|-------------------------------------------------------------------------------------|--------------------------------------------------------------------------------------|
|                                                             | -0.509924741                                                                        | -0.639112727                                                                         |
| 39<br>$4f_{5/2,7/2}(\text{Yb})$<br>$2p_{1/2,3/2}(\text{F})$ | 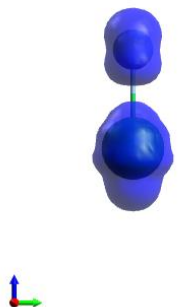   |    |
|                                                             | -0.129066590                                                                        | -0.241206568                                                                         |
| 40<br>$4f_{5/2,7/2}(\text{Yb})$<br>$2p_{1/2,3/2}(\text{F})$ |  |  |

## 2 Kramers restricted configuration interaction (KRCI)

### 2.1 Hamiltonian

Due to limitations in the implementation it is not possible to run the more accurate  ${}^2\text{DC}^M$ <sup>4</sup> in combination with Kramers-restricted configuration interaction. Therefore, we have run the computations with the X2C-AMFI<sup>5,6</sup> Hamiltonian. In order to estimate the influence of this approximation we compare the results with the 4-component Dirac-Coulomb-Breit Hamiltonian (DCB)<sup>7</sup> in tables S2 and S3 for the Yb cation. The effect of the basis set

Table S2: Transition energies ( $\text{cm}^{-1}$ ) and line strengths / squared transition dipole moments ( $e^2 a_0^2$ ) for the Yb cation. Reference values have been obtained from the NIST database,<sup>8</sup> the computed values were obtained for different basis sets with Kramers-restricted configuration interaction.

| state                        | conf        | NIST <sup>9</sup> | 2z (x2c)         | 3z (x2c)         | 4z (x2c)         | 2z (DCB <sup>7</sup> ) | 3z (DCB <sup>7</sup> ) | 4z (DCB <sup>7</sup> ) |
|------------------------------|-------------|-------------------|------------------|------------------|------------------|------------------------|------------------------|------------------------|
|                              |             | E                 | E                | E                | E                | E                      | E                      | E                      |
| ${}^2\text{S}_{1/2}$         | $4f^{14}6s$ | 0                 | 0                | 0                | 0                | 0                      | 0                      | 0                      |
| ${}^2\text{D}_{3/2}$         | $4f^{14}5d$ | 22961             | 23322            | 22802            | 23606            | 23389                  | 22871                  | 23674                  |
| ${}^2\text{D}_{5/2}$         | $4f^{14}5d$ | 24333             | 23882            | 23321            | 24117            | 23945                  | 23386                  | 24182                  |
| ${}^2\text{P}_{1/2}^{\circ}$ | $4f^{14}6p$ | 27062             | 25210            | 24533            | 25331            | 25241                  | 24564                  | 25362                  |
| ${}^2\text{P}_{3/2}^{\circ}$ | $4f^{14}6p$ | 30392             | 28104            | 27385            | 28153            | 28139                  | 27422                  | 28189                  |
|                              |             | S                 | TDM <sup>2</sup> | TDM <sup>2</sup> | TDM <sup>2</sup> | TDM <sup>2</sup>       | TDM <sup>2</sup>       | TDM <sup>2</sup>       |
| ${}^2\text{D}_{3/2}$         | $4f^{14}5d$ |                   | 0.0              | 0.0              | 0.0              | 0.0                    | 0.0                    | 0.0                    |
| ${}^2\text{D}_{5/2}$         | $4f^{14}5d$ |                   | 0.0              | 0.0              | 0.0              | 0.0                    | 0.0                    | 0.0                    |
| ${}^2\text{P}_{1/2}^{\circ}$ | $4f^{14}6p$ | 6.1               | 5.3              | 5.5              | 5.3              | 5.3                    | 5.5                    | 5.3                    |
| ${}^2\text{P}_{3/2}^{\circ}$ | $4f^{14}6p$ | 11.4              | 16.4             | 17.3             | 16.6             | 16.4                   | 17.3                   | 16.6                   |

Table S3: Transition energies between states with an open f-shell obtained with configuration interaction. Transition energies relative to the  ${}^2\text{F}_{7/2}^{\circ}$  state are listed.

| state                        | conf                   | NIST <sup>9</sup> | x2c  |      |      | DCB <sup>7</sup> |      |      |
|------------------------------|------------------------|-------------------|------|------|------|------------------|------|------|
|                              |                        |                   | 2z   | 3z   | 4z   | 2z               | 3z   | 4z   |
| ${}^2\text{F}_{7/2}^{\circ}$ | $4f^{13}\sigma_{6s}^2$ | 0                 | 0    | 0    | 0    | 0                | 0    | 0    |
| ${}^3[3/2]_{5/2}^{\circ}$    | $4f^{13}5d\ 6s$        | 5340              | 4260 | 5538 | 4618 | 4349             | 5630 | 4711 |
| ${}^3[3/2]_{3/2}^{\circ}$    | $4f^{13}5d\ 6s$        | 7339              | 6387 | 7822 | 7123 | 6478             | 7917 | 7218 |
| ${}^3[11/2]_{9/2}^{\circ}$   | $4f^{13}5d\ 6s$        | 8806              | 8214 | 9325 | 8314 | 8304             | 9419 | 8408 |
| ${}^3[11/2]_{11/2}^{\circ}$  | $4f^{13}5d\ 6s$        | 9144              | 8320 | 9431 | 8447 | 8409             | 9524 | 8540 |

is much larger and since no significant impact can be expected we used the X2C-AMFI Hamiltonian to obtain the data.

## 2.2 Closed f-shell - potential energy curves

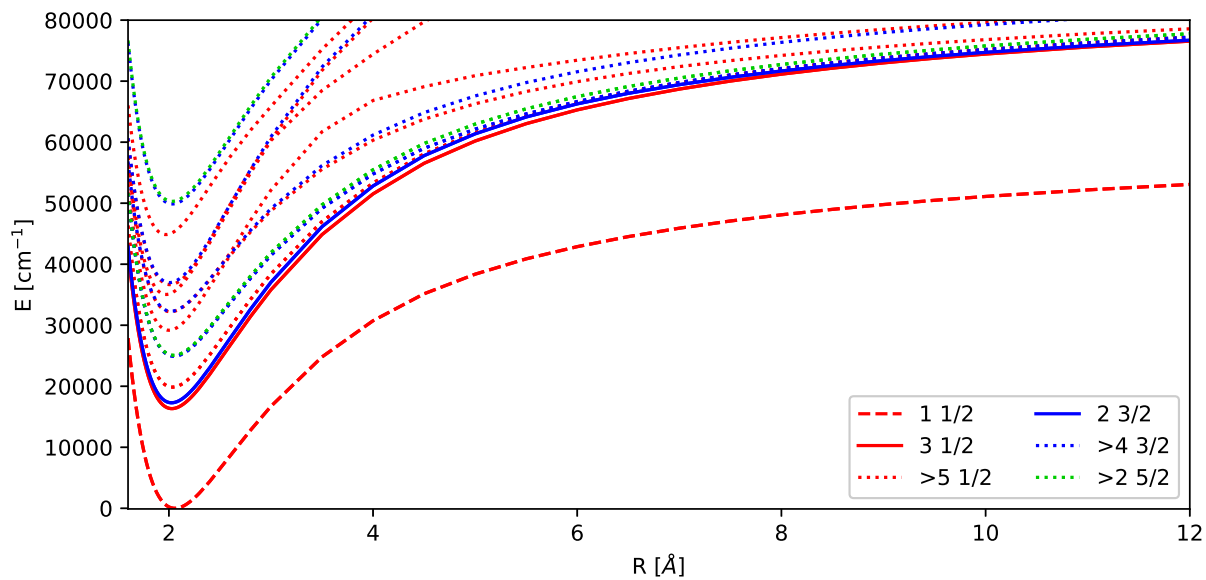

Figure S2: KRCI PECs for states with  $f^{14}$  for the quadruple zeta basis sets.

Table S4: Spectroscopic constants for the different electronic states ( $\Omega = 1/2, 3/2, 5/2$ ) with  $f^{14}$  obtained by KRCI for the double and triple zeta basis sets. Vibrational constant ( $\omega_e$ ), anharmonicity constant ( $\omega_e\chi_e$ ), and transition energy ( $T_e$ ), are given in  $\text{cm}^{-1}$ , the equilibrium bond distance ( $r_e$ ) in  $\text{\AA}$ .

| $\Omega$ | state | v2z    |            |                  |       | v3z    |            |                  |       |
|----------|-------|--------|------------|------------------|-------|--------|------------|------------------|-------|
|          |       | $r_e$  | $\omega_e$ | $\omega_e\chi_e$ | $T_e$ | $r_e$  | $\omega_e$ | $\omega_e\chi_e$ | $T_e$ |
| 1/2      | 1     | 2.0609 | 493        | 2.29             | 0     | 2.0594 | 493        | 2.27             | 0     |
| 1/2      | 2     | 2.0316 | 520        | 2.30             | 17319 | 2.0299 | 521        | 2.27             | 16663 |
| 1/2      | 3     | 2.0397 | 513        | 2.49             | 21252 | 2.0382 | 513        | 2.33             | 20270 |
| 1/2      | 4     | 2.1095 | 444        | 2.25             | 35868 | 2.0079 | 547        | 2.16             | 30993 |
| 1/2      | 5     | 2.0440 | 503        | 1.88             | 37977 | 2.0531 | 481        | 2.51             | 33700 |
| 1/2      | 6     | 2.0080 | 574        | 2.83             | 42795 | 1.9871 | 579        | 2.31             | 37776 |
| 1/2      | 7     | 2.0608 | 509        | 2.01             | 52474 | 2.0149 | 537        | 1.98             | 42915 |
| 3/2      | 1     | 2.0281 | 524        | 2.32             | 18425 | 2.0266 | 525        | 2.28             | 17667 |
| 3/2      | 2     | 2.0779 | 472        | 2.31             | 26817 | 2.0592 | 486        | 2.34             | 25450 |
| 3/2      | 3     | 2.1120 | 448        | 2.27             | 36017 | 2.0545 | 483        | 2.50             | 33792 |
| 3/2      | 4     | 2.0558 | 509        | 2.03             | 54498 | 2.0114 | 538        | 1.98             | 43720 |
| 5/2      | 1     | 2.0761 | 474        | 2.31             | 27016 | 2.0575 | 488        | 2.33             | 25572 |

Table S5: Spectroscopic constants for the different electronic states ( $\Omega = 1/2, 3/2, 5/2$ ) with  $f^{14}$  obtained by KRCI for the quadruple zeta and extrapolation to the complete basis set. Vibrational constant ( $\omega_e$ ), anharmonicity constant ( $\omega_e\chi_e$ ), and transition energy ( $T_e$ ), are given in  $\text{cm}^{-1}$ , the equilibrium bond distance ( $r_e$ ) in  $\text{\AA}$ .

| $\Omega$ | state | v4z    |            |                  |       | CBS    |            |                  |       |
|----------|-------|--------|------------|------------------|-------|--------|------------|------------------|-------|
|          |       | $r_e$  | $\omega_e$ | $\omega_e\chi_e$ | $T_e$ | $r_e$  | $\omega_e$ | $\omega_e\chi_e$ | $T_e$ |
| 1/2      | 1     | 2.0587 | 492        | 2.30             | 0     | 2.0829 | 465        | 2.40             | 0     |
| 1/2      | 2     | 2.0290 | 521        | 2.30             | 16338 | 2.0504 | 496        | 2.38             | 16189 |
| 1/2      | 3     | 2.0351 | 515        | 2.37             | 19857 | 2.0552 | 490        | 2.49             | 19631 |
| 1/2      | 4     | 2.0012 | 554        | 2.23             | 29183 | 2.0154 | 537        | 2.31             | 28043 |
| 1/2      | 5     | 2.0169 | 509        | 2.97             | 32206 | 2.0131 | 505        | 3.44             | 31208 |
| 1/2      | 6     | 1.9727 | 587        | 2.35             | 35042 | 1.9792 | 570        | 2.41             | 33312 |
| 1/2      | 7     | 2.0103 | 542        | 1.87             | 36658 | 2.0269 | 525        | 1.79             | 32245 |
| 3/2      | 1     | 2.0260 | 524        | 2.31             | 17296 | 2.0473 | 499        | 2.37             | 17123 |
| 3/2      | 2     | 2.0496 | 492        | 2.40             | 24927 | 2.0669 | 470        | 2.50             | 24583 |
| 3/2      | 3     | 2.0193 | 509        | 2.86             | 32297 | 2.0160 | 503        | 3.22             | 31295 |
| 3/2      | 4     | 2.0058 | 546        | 1.98             | 36990 | 2.0215 | 530        | 1.96             | 32245 |
| 5/2      | 1     | 2.0474 | 495        | 2.39             | 25067 | 2.0639 | 474        | 2.48             | 24744 |

## 2.3 Closed f-shell - dipole moments

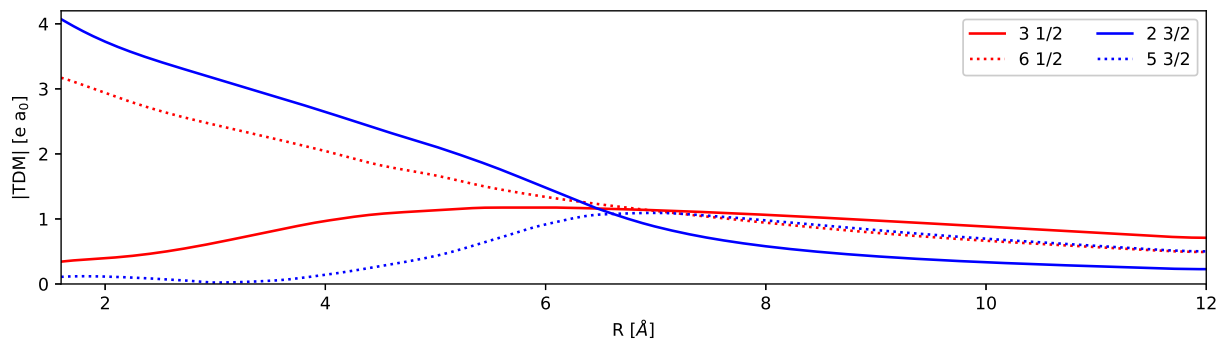

Figure S3: KRCI TDMs for states with  $f^{14}$  for the quadruple zeta basis sets.

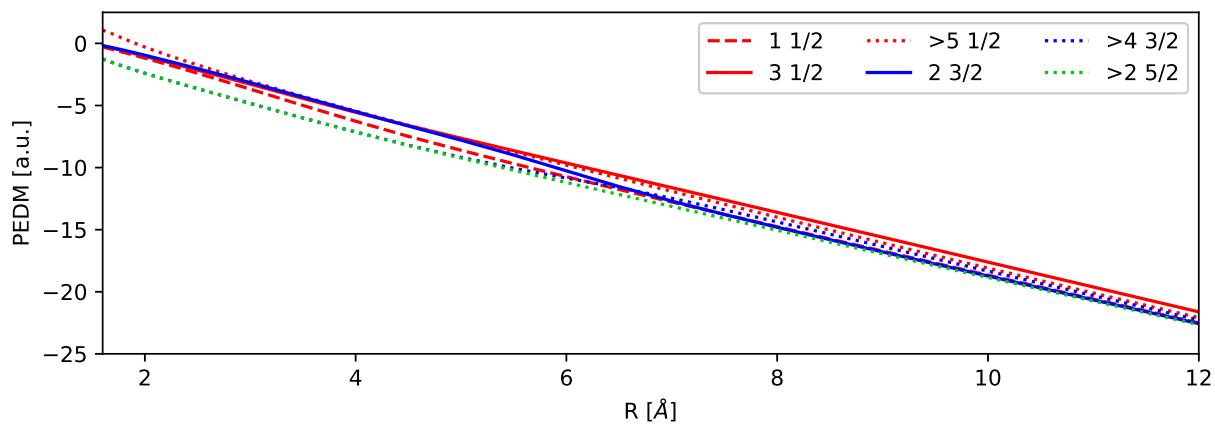

Figure S4: KRCI PEDMs for states with  $f^{14}$  for the quadruple zeta basis sets.

## 2.4 Open f-shell - potential energy curves

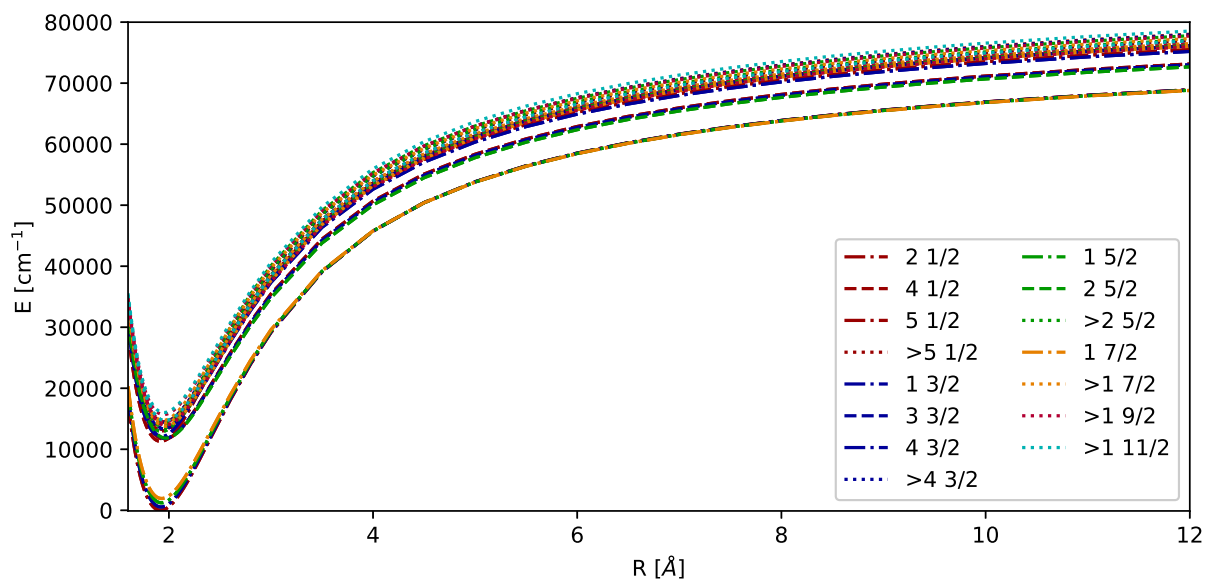

Figure S5: KRCI PECs for states with  $f^{13}$  for the triple zeta basis sets.



Table S6: Spectroscopic constants for the different electronic states ( $\Omega = 1/2, 3/2, 5/2$ ) with  $f^{13}$  obtained by KRCI for the double and triple zeta basis sets. Vibrational constant ( $\omega_e$ ), anharmonicity constant ( $\omega_e\chi_e$ ), and transition energy ( $T_e$ ), are given in  $\text{cm}^{-1}$ , the equilibrium bond distance ( $r_e$ ) in Å.

| $\Omega$ | state | v2z    |            |                  |       | v3z    |            |                  |       |
|----------|-------|--------|------------|------------------|-------|--------|------------|------------------|-------|
|          |       | $r_e$  | $\omega_e$ | $\omega_e\chi_e$ | $T_e$ | $r_e$  | $\omega_e$ | $\omega_e\chi_e$ | $T_e$ |
| 1/2      | 1     | 1.9254 | 627        | 2.53             | 0     | 1.9188 | 631        | 2.73             | 0     |
| 1/2      | 2     | 1.9762 | 510        | 0.23             | 10834 | 1.9540 | 517        | 1.24             | 11083 |
| 1/2      | 3     | 1.9321 | 702        | 7.89             | 11243 | 1.9314 | 684        | 4.10             | 11352 |
| 1/2      | 4     | 1.9568 | 558        | 2.79             | 12833 | 1.9404 | 584        | 3.07             | 12811 |
| 1/2      | 5     | 1.9555 | 575        | 2.64             | 13071 | 1.9469 | 582        | 2.73             | 12946 |
| 1/2      | 6     | 1.9689 | 578        | 2.38             | 13663 | 1.9631 | 569        | 2.12             | 13947 |
| 1/2      | 7     | 1.9645 | 578        | 2.25             | 13884 | 1.9566 | 580        | 2.61             | 14069 |
| 3/2      | 1     | 1.9305 | 624        | 2.54             | 557   | 1.9239 | 628        | 2.76             | 545   |
| 3/2      | 2     | 1.9797 | 556        | 2.43             | 10849 | 1.9677 | 561        | 2.48             | 11212 |
| 3/2      | 3     | 1.9331 | 597        | 5.44             | 12028 | 1.9262 | 625        | 3.62             | 12045 |
| 3/2      | 4     | 1.9706 | 587        | 0.62             | 12938 | 1.9527 | 576        | 2.65             | 13073 |
| 3/2      | 5     | 1.9639 | 575        | 1.88             | 13087 | 1.9519 | 569        | 2.22             | 13194 |
| 3/2      | 6     | 1.9621 | 576        | 2.73             | 13632 | 1.9596 | 576        | 2.24             | 13797 |
| 3/2      | 7     | 1.9592 | 591        | 2.88             | 13966 | 1.9568 | 594        | 2.69             | 14083 |
| 5/2      | 1     | 1.9341 | 619        | 2.54             | 1272  | 1.9277 | 623        | 2.77             | 1227  |
| 5/2      | 2     | 1.9837 | 554        | 2.44             | 10843 | 1.9736 | 559        | 2.49             | 11295 |
| 5/2      | 3     | 1.9420 | 548        | 5.37             | 12945 | 1.9293 | 580        | 6.14             | 12923 |
| 5/2      | 4     | 1.9568 | 625        | 3.55             | 13211 | 1.9563 | 622        | 0.70             | 13264 |
| 5/2      | 5     | 1.9664 | 593        | 0.60             | 13543 | 1.9553 | 580        | 1.95             | 13670 |
| 5/2      | 6     | 1.9558 | 578        | 2.67             | 14218 | 1.9474 | 588        | 2.81             | 14225 |
| 7/2      | 1     | 1.9355 | 613        | 2.50             | 2017  | 1.9290 | 617        | 2.75             | 1931  |
| 7/2      | 2     | 1.9753 | 566        | 2.46             | 13192 | 1.9665 | 570        | 2.45             | 13424 |
| 7/2      | 3     | 1.9712 | 569        | 2.47             | 13565 | 1.9613 | 573        | 2.48             | 13819 |
| 7/2      | 4     | 1.9626 | 569        | 2.41             | 14333 | 1.9458 | 585        | 2.94             | 14475 |
| 9/2      | 1     | 1.9776 | 563        | 2.48             | 13226 | 1.9707 | 568        | 2.47             | 13576 |
| 9/2      | 2     | 1.9755 | 566        | 2.48             | 13544 | 1.9665 | 571        | 2.50             | 13933 |
| 9/2      | 3     | 1.9709 | 571        | 2.51             | 14319 | 1.9592 | 577        | 2.54             | 14880 |
| 11/2     | 1     | 1.9769 | 564        | 2.48             | 13466 | 1.9691 | 569        | 2.49             | 14001 |
| 11/2     | 2     | 1.9744 | 568        | 2.49             | 14177 | 1.9628 | 576        | 2.52             | 14904 |

Table S7: Spectroscopic constants for the different electronic states ( $\Omega = 1/2, 3/2, 5/2$ ) with  $f^{13}$  obtained by KRCI for the quadruple zeta and extrapolation to the complete basis sets. Vibrational constant ( $\omega_e$ ), anharmonicity constant ( $\omega_e\chi_e$ ), and transition energy ( $T_e$ ), are given in  $\text{cm}^{-1}$ , the equilibrium bond distance ( $r_e$ ) in  $\text{\AA}$ .

| $\Omega$ | state | v4z    |            |                  |       | CBS    |            |                  |       |
|----------|-------|--------|------------|------------------|-------|--------|------------|------------------|-------|
|          |       | $r_e$  | $\omega_e$ | $\omega_e\chi_e$ | $T_e$ | $r_e$  | $\omega_e$ | $\omega_e\chi_e$ | $T_e$ |
| 1/2      | 1     | 1.9183 | 632        | 2.60             | 0     | 1.9200 | 631        | 2.51             | 0     |
| 1/2      | 2     | 1.9191 | 583        | 8.23             | 11329 | 1.9038 | 655        | 13.57            | 11428 |
| 1/2      | 3     | 1.9497 | 641        | 0.17             | 11672 | 1.9603 | 620        | 0.08             | 11876 |
| 1/2      | 4     | 1.9366 | 593        | 2.73             | 13044 | 1.9360 | 598        | 2.50             | 13206 |
| 1/2      | 5     | 1.9426 | 588        | 2.65             | 13240 | 1.9417 | 592        | 2.56             | 13443 |
| 1/2      | 6     | 1.9566 | 576        | 2.40             | 14295 | 1.9539 | 582        | 2.71             | 14531 |
| 1/2      | 7     | 1.9503 | 580        | 2.75             | 14504 | 1.9479 | 578        | 2.71             | 14808 |
| 3/2      | 1     | 1.9236 | 628        | 2.61             | 543   | 1.9253 | 628        | 2.50             | 540   |
| 3/2      | 2     | 1.9589 | 530        | 0.82             | 11810 | 1.9505 | 516        | 0.80             | 12202 |
| 3/2      | 3     | 1.9306 | 667        | 4.87             | 12069 | 1.9331 | 711        | 8.45             | 12062 |
| 3/2      | 4     | 1.9483 | 582        | 2.55             | 13356 | 1.9473 | 585        | 2.47             | 13549 |
| 3/2      | 5     | 1.9440 | 578        | 2.90             | 13495 | 1.9408 | 584        | 3.30             | 13699 |
| 3/2      | 6     | 1.9545 | 575        | 2.67             | 14251 | 1.9528 | 574        | 2.97             | 14567 |
| 3/2      | 7     | 1.9575 | 591        | 1.96             | 14429 | 1.9601 | 589        | 1.50             | 14667 |
| 5/2      | 1     | 1.9276 | 623        | 2.61             | 1227  | 1.9296 | 622        | 2.46             | 1223  |
| 5/2      | 2     | 1.9690 | 563        | 2.45             | 11828 | 1.9677 | 564        | 2.42             | 12196 |
| 5/2      | 3     | 1.9282 | 614        | 3.10             | 12923 | 1.9302 | 635        | 1.41             | 12919 |
| 5/2      | 4     | 1.9579 | 592        | 1.08             | 13556 | 1.9627 | 571        | 0.93             | 13747 |
| 5/2      | 5     | 1.9482 | 582        | 2.57             | 14030 | 1.9451 | 584        | 3.07             | 14278 |
| 5/2      | 6     | 1.9449 | 593        | 2.66             | 14442 | 1.9453 | 596        | 2.53             | 14590 |
| 7/2      | 1     | 1.9293 | 617        | 2.59             | 1935  | 1.9315 | 616        | 2.43             | 1933  |
| 7/2      | 2     | 1.9627 | 573        | 2.43             | 13764 | 1.9620 | 574        | 2.42             | 13994 |
| 7/2      | 3     | 1.9552 | 576        | 2.39             | 14284 | 1.9528 | 577        | 2.31             | 14607 |
| 7/2      | 4     | 1.9424 | 595        | 2.81             | 14729 | 1.9422 | 601        | 2.69             | 14905 |
| 9/2      | 1     | 1.9669 | 570        | 2.49             | 13962 | 1.9663 | 571        | 2.49             | 14224 |
| 9/2      | 2     | 1.9613 | 575        | 2.48             | 14516 | 1.9596 | 576        | 2.45             | 14923 |
| 9/2      | 3     | 1.9494 | 584        | 2.59             | 15691 | 1.9444 | 588        | 2.62             | 16262 |
| 11/2     | 1     | 1.9645 | 572        | 2.49             | 14706 | 1.9633 | 574        | 2.48             | 15202 |
| 11/2     | 2     | 1.9525 | 584        | 2.52             | 16023 | 1.9472 | 588        | 2.51             | 16817 |

## 2.5 Open f-shell - dipole moments

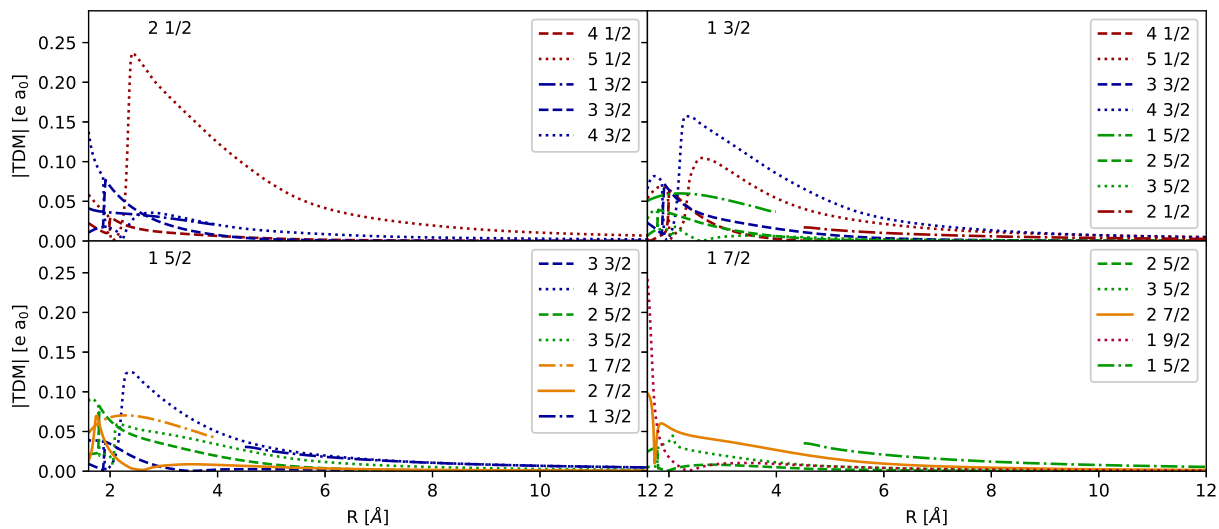

Figure S6: KRCI TDMs for states with  $f^{14}$  for the quadruple zeta basis sets.

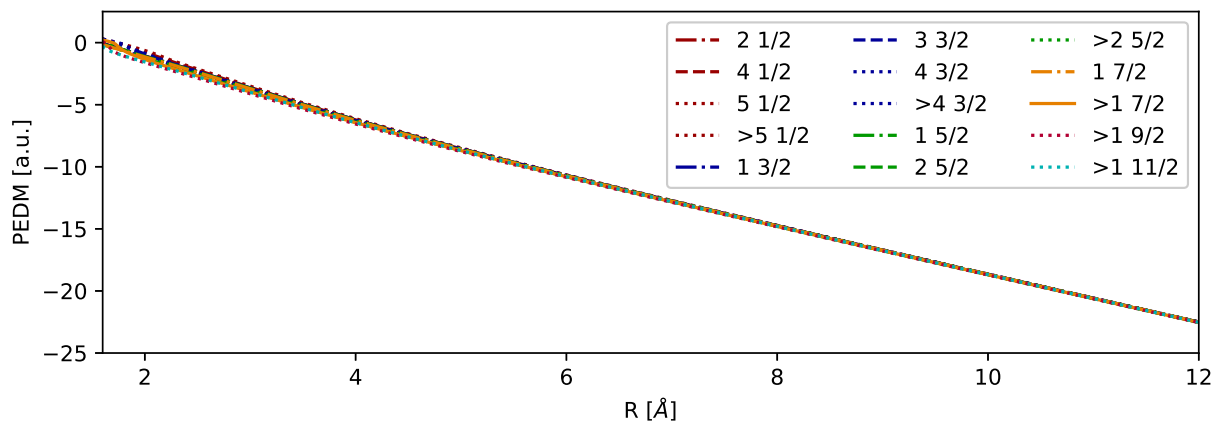

Figure S7: KRCI PEDMs for states with  $f^{13}$  for the quadruple zeta basis sets.

## 2.6 Combined potentials, shifting

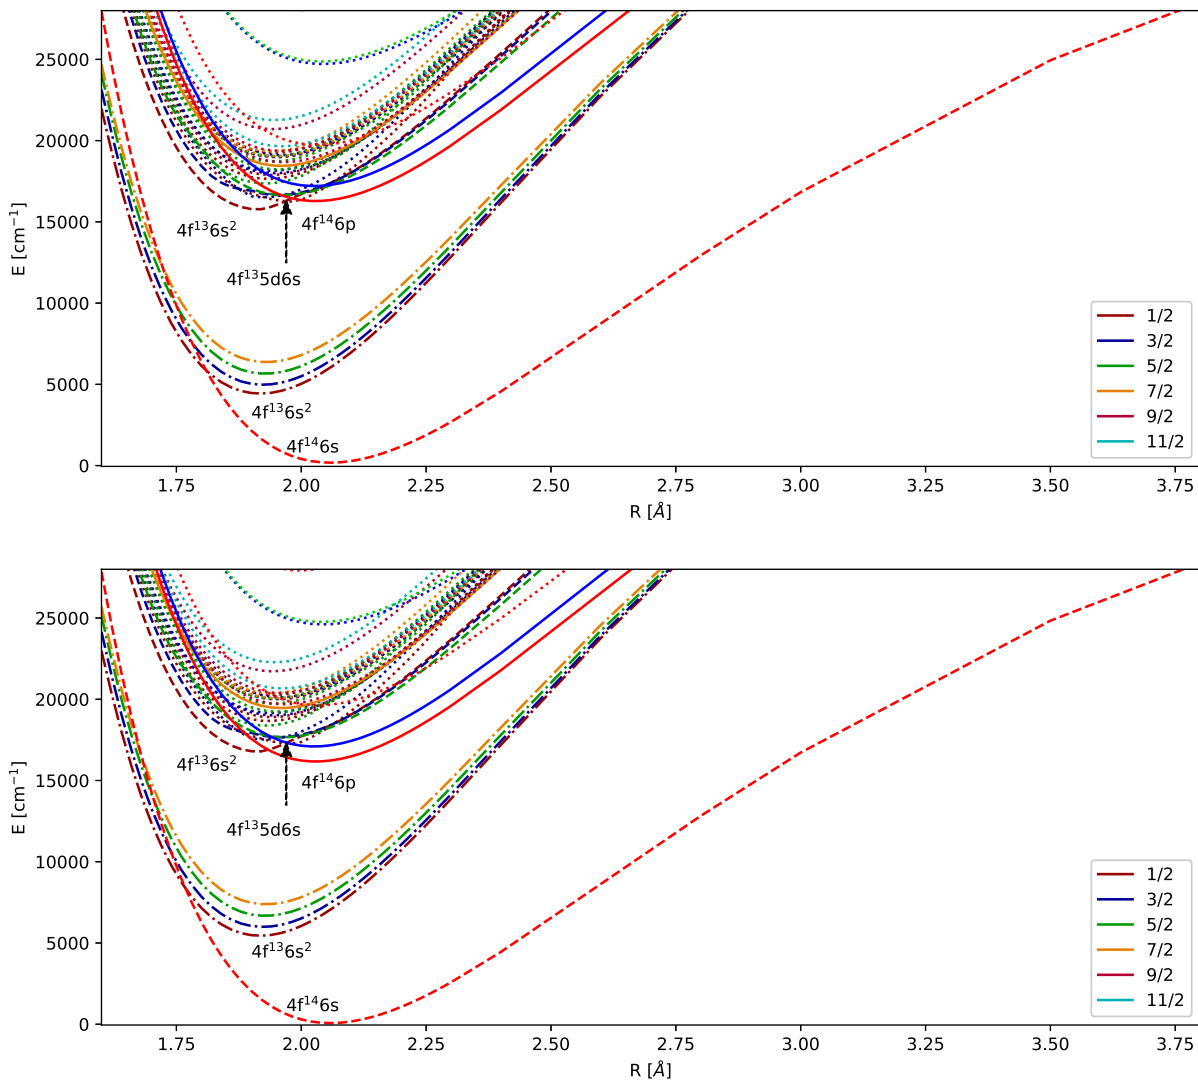

Figure S8: Combination of the sets of KRCI potentials. The lowest  $\Omega = 1/2$  are denoted by the assigned dominant configuration. For the upper part the shift was applied at  $15 \text{ \AA}$ , for the lower part at  $10 \text{ \AA}$ .

The combination of the potential energy by shifting according to the outermost point is shown in figure S8. While the minimum of the potential changes from about  $55000$  to  $51000 \text{ cm}^{-1}$ , there are only small changes in the relative position of the minima of different electronic states.

Figure S9 shows the combined potentials energy curves for larger bond distances.

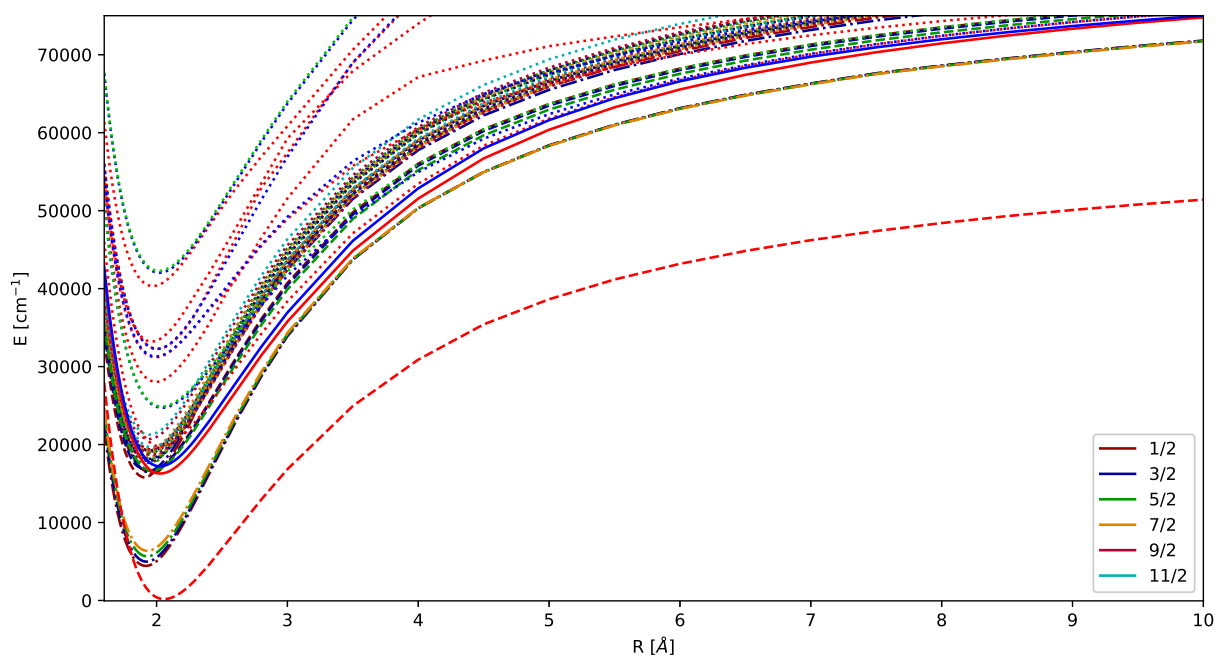

Figure S9: KRCI PECs for states with open and closed f-shell for extrapolation to the basis set limit.

## 2.7 Collection - transition dipole moments

Table S8: KRCI transition dipole moment table for the equilibrium distances of the lower state, corresponding to the TDMs displayed in figures S3 and S6. Values for the dyall.v4z basis set are listed.

| $\Omega_L$ | state <sub>L</sub> | $\Omega_U$ | state <sub>U</sub> | TDM  [e a <sub>0</sub> ] |
|------------|--------------------|------------|--------------------|--------------------------|
| 1          | 1                  | 1          | 3                  | 0.403                    |
| 2          | 1                  | 1          | 6                  | 2.900                    |
| 2          | 1                  | 2          | 2                  | 3.684                    |
| 2          | 1                  | 2          | 5                  | 0.111                    |
| 2          | 2                  | 1          | 4                  | 0.010                    |
| 2          | 2                  | 1          | 5                  | 0.034                    |
| 2          | 2                  | 2          | 1                  | 0.036                    |
| 2          | 2                  | 2          | 3                  | 0.076                    |
| 2          | 1                  | 1          | 4                  | 0.010                    |
| 2          | 1                  | 1          | 5                  | 0.067                    |
| 2          | 1                  | 1          | 3                  | 0.071                    |
| 2          | 1                  | 1          | 4                  | 0.004                    |
| 2          | 1                  | 1          | 1                  | 0.058                    |
| 2          | 1                  | 1          | 2                  | 0.037                    |
| 2          | 1                  | 2          | 3                  | 0.037                    |
| 2          | 1                  | 2          | 4                  | 0.001                    |
| 2          | 1                  | 2          | 2                  | 0.070                    |
| 2          | 1                  | 2          | 3                  | 0.021                    |
| 2          | 1                  | 2          | 1                  | 0.066                    |
| 2          | 1                  | 2          | 2                  | 0.035                    |
| 2          | 1                  | 2          | 2                  | 0.001                    |
| 2          | 1                  | 2          | 3                  | 0.034                    |
| 2          | 1                  | 2          | 1                  | 0.059                    |
| 2          | 1                  | 2          | 2                  | 0.026                    |

### 3 Intermediate Hamiltonian Fock Space Coupled Cluster (IHFS-CCSD)

#### 3.1 Closed f-shell - potential energy curves

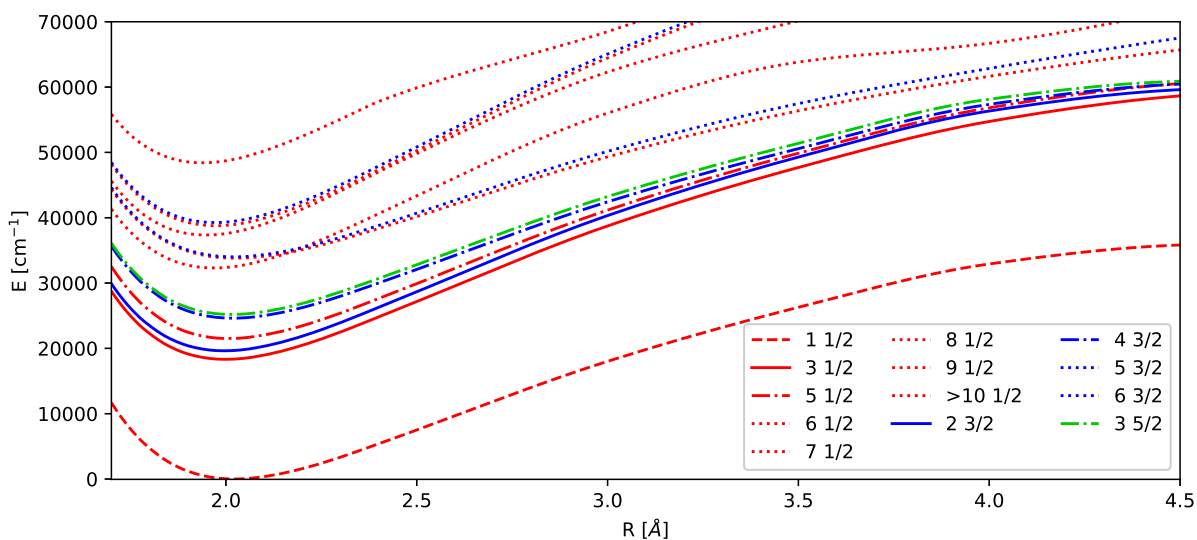

Figure S10: IHFS-CCSD PECs for states from the (0h,1p) sector with a cation reference for the quadruple zeta basis sets.

Table S9: Spectroscopic constants for the different electronic states ( $\Omega = 1/2, 3/2, 5/2$ ) obtained by IHFS-CCSD for the (0h,1p) sector using double and triple zeta basis sets. Vibrational constant ( $\omega_e$ ), anharmonicity constant ( $\omega_e\chi_e$ ), and transition energy ( $T_e$ ), are given in  $\text{cm}^{-1}$ , the equilibrium bond distance ( $r_e$ ) in Å.

| $\Omega$ | state | v2z    |            |                  |       | v3z    |            |                  |       |
|----------|-------|--------|------------|------------------|-------|--------|------------|------------------|-------|
|          |       | $r_e$  | $\omega_e$ | $\omega_e\chi_e$ | $T_e$ | $r_e$  | $\omega_e$ | $\omega_e\chi_e$ | $T_e$ |
| 1/2      | 1     | 2.0315 | 502        | 2.33             | 0     | 2.0281 | 504        | 2.32             | 0     |
| 1/2      | 2     | 2.0045 | 524        | 2.19             | 18610 | 2.0037 | 526        | 2.22             | 18425 |
| 1/2      | 3     | 2.0133 | 518        | 2.31             | 22113 | 2.0127 | 521        | 2.28             | 21687 |
| 1/2      | 4     | 2.0905 | 443        | 2.21             | 36083 | 1.9680 | 543        | 6.91             | 33550 |
| 1/2      | 5     | 1.9873 | 518        | 3.00             | 38956 | 2.0481 | 524        | 0.02             | 34724 |
| 1/2      | 6     | 1.9994 | 569        | 2.17             | 42974 | 1.9648 | 582        | 2.30             | 39207 |
| 1/2      | 7     | 2.0383 | 508        | 1.98             | 56216 | 1.9964 | 532        | 1.92             | 46115 |
| 1/2      | 8     | 1.8438 | 813        | 3.41             | 66635 | 1.9414 | 591        | 2.37             | 54196 |
| 3/2      | 1     | 2.0010 | 527        | 2.20             | 19980 | 2.0004 | 530        | 2.24             | 19747 |
| 3/2      | 2     | 2.0394 | 484        | 2.17             | 25904 | 2.0268 | 496        | 2.24             | 24977 |
| 3/2      | 3     | 2.0892 | 450        | 2.19             | 36389 | 2.0448 | 470        | 2.39             | 34962 |
| 3/2      | 4     | 2.0319 | 510        | 2.01             | 58253 | 1.9909 | 535        | 1.99             | 46891 |
| 5/2      | 1     | 2.0372 | 486        | 2.18             | 26612 | 2.0243 | 499        | 2.26             | 25563 |
| ION      |       | 1.9506 | 594        | 2.08             | 48113 | 1.9483 | 597        | 2.15             | 48352 |

Table S10: Spectroscopic constants for the different electronic states ( $\Omega = 1/2, 3/2, 5/2$ ) obtained by IHFS-CCSD for the (0h,1p) sector using double and triple zeta and extrapolation to the complete basis sets. Vibrational constant ( $\omega_e$ ), anharmonicity constant ( $\omega_e\chi_e$ ), and transition energy ( $T_e$ ), are given in  $\text{cm}^{-1}$ , the equilibrium bond distance ( $r_e$ ) in Å.

| $\Omega$ | state | v4z    |            |                  |       | CBS    |            |                  |       |
|----------|-------|--------|------------|------------------|-------|--------|------------|------------------|-------|
|          |       | $r_e$  | $\omega_e$ | $\omega_e\chi_e$ | $T_e$ | $r_e$  | $\omega_e$ | $\omega_e\chi_e$ | $T_e$ |
| 1/2      | 1     | 2.0220 | 510        | 2.60             | 0     | 2.0176 | 515        | 2.82             | 0     |
| 1/2      | 2     | 1.9988 | 533        | 2.46             | 18323 | 1.9953 | 539        | 2.63             | 18249 |
| 1/2      | 3     | 2.0072 | 527        | 2.54             | 21506 | 2.0032 | 533        | 2.73             | 21375 |
| 1/2      | 4     | 1.9649 | 574        | 4.13             | 32306 | 1.9644 | 581        | 1.82             | 31416 |
| 1/2      | 5     | 2.0298 | 506        | 0.35             | 33748 | 2.0155 | 494        | 0.68             | 33018 |
| 1/2      | 6     | 1.9477 | 599        | 2.29             | 37343 | 1.9359 | 610        | 2.08             | 35954 |
| 1/2      | 7     | 1.9732 | 577        | 2.08             | 38770 | 1.9597 | 608        | 1.95             | 33366 |
| 1/2      | 8     | 1.9384 | 592        | 2.46             | 48402 | 1.9363 | 592        | 2.39             | 44179 |
| 3/2      | 1     | 1.9955 | 537        | 2.46             | 19629 | 1.9920 | 542        | 2.63             | 19543 |
| 3/2      | 2     | 2.0182 | 505        | 2.53             | 24624 | 2.0120 | 512        | 2.73             | 24363 |
| 3/2      | 3     | 2.0208 | 482        | 2.69             | 34007 | 2.0031 | 493        | 2.96             | 33271 |
| 3/2      | 4     | 1.9703 | 576        | 2.10             | 39254 | 1.9582 | 605        | 1.96             | 33646 |
| 5/2      | 1     | 2.0154 | 508        | 2.53             | 25193 | 2.0089 | 515        | 2.77             | 24919 |
| ION      |       | 1.9450 | 604        | 1.98             | 48426 | 1.9437 | 609        | 1.86             | 49901 |



## 3.2 Open f-shell - potential energy curves

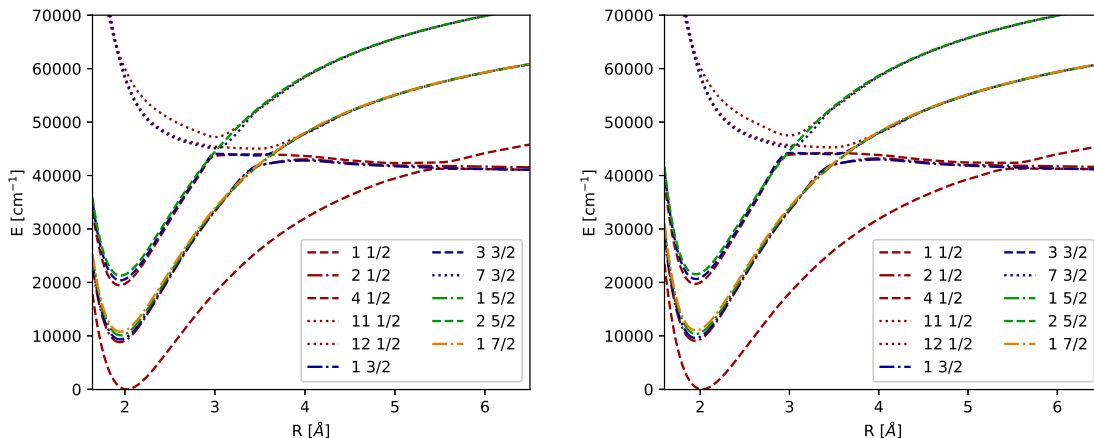

Figure S11: IHFS-CCSD PECs for (1h,0p) sector starting from the anion reference for the quadruple zeta basis sets and a shift of 0.2 and 0.1 Hartree, the extrapolation to 0.0 Hartree is shown in the figure below.

Table S11: Spectroscopic constants for the different electronic states ( $\Omega = 1/2, 3/2, 5/2$ ) obtained by XIHFS-CCSD for the (1h,0p) sector using double and triple zeta basis sets. Vibrational constant ( $\omega_e$ ), anharmonicity constant ( $\omega_e\chi_e$ ), and transition energy ( $T_e$ ), are given in  $\text{cm}^{-1}$ , the equilibrium bond distance ( $r_e$ ) in Å.

| $\Omega$ | state | v2z    |            |                  |       | v3z    |            |                  |       |
|----------|-------|--------|------------|------------------|-------|--------|------------|------------------|-------|
|          |       | $r_e$  | $\omega_e$ | $\omega_e\chi_e$ | $T_e$ | $r_e$  | $\omega_e$ | $\omega_e\chi_e$ | $T_e$ |
| 1/2      | 1     | 2.0239 | 497        | 2.06             | 0     | 2.0244 | 504        | 2.26             | 0     |
| 1/2      | 2     | 1.9481 | 619        | 3.17             | 4282  | 1.9463 | 598        | 2.81             | 7059  |
| 1/2      | 3     | 1.9410 | 605        | 2.73             | 14808 | 1.9444 | 594        | 2.72             | 17729 |
| 3/2      | 1     | 1.9440 | 602        | 2.73             | 4630  | 1.9479 | 591        | 2.73             | 7521  |
| 3/2      | 2     | 1.9478 | 599        | 2.75             | 15710 | 1.9518 | 588        | 2.72             | 18616 |
| 5/2      | 1     | 1.9488 | 597        | 2.74             | 5407  | 1.9530 | 586        | 2.72             | 8263  |
| 5/2      | 2     | 1.9491 | 592        | 2.73             | 16625 | 1.9533 | 581        | 2.71             | 19483 |
| 7/2      | 1     | 1.9487 | 591        | 2.73             | 6102  | 1.9529 | 581        | 2.71             | 8918  |
| ION      |       | 2.1018 | 425        | 2.71             | -8767 | 2.0935 | 430        | 2.66             | -9418 |

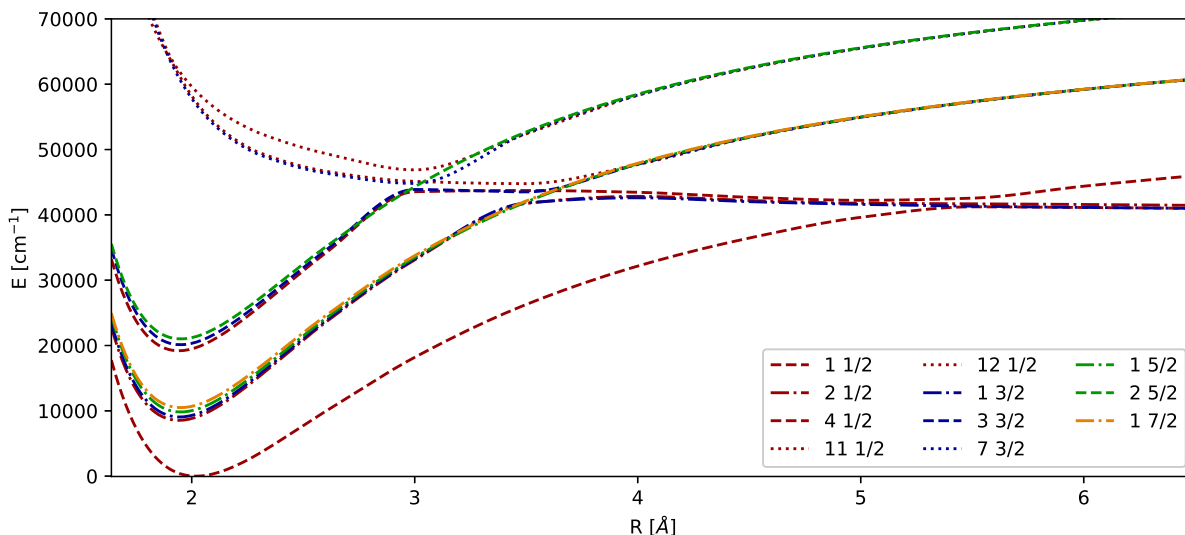

Figure S12: XIHFS-CCSD PECs for (1h,0p) sector starting from the anion reference for the quadruple zeta basis sets, extrapolation using the results in figure S11

Table S12: Spectroscopic constants for the different electronic states ( $\Omega = 1/2, 3/2, 5/2$ ) obtained by XIHFS-CCSD for the (1h,0p) sector using quadruple zeta and extrapolation to the complete basis sets. Vibrational constant ( $\omega_e$ ), anharmonicity constant ( $\omega_e\chi_e$ ), and transition energy ( $T_e$ ), are given in  $\text{cm}^{-1}$ , the equilibrium bond distance ( $r_e$ ) in  $\text{\AA}$ .

| $\Omega$ | state | v4z    |            |                  |       | CBS    |            |                  |       |
|----------|-------|--------|------------|------------------|-------|--------|------------|------------------|-------|
|          |       | $r_e$  | $\omega_e$ | $\omega_e\chi_e$ | $T_e$ | $r_e$  | $\omega_e$ | $\omega_e\chi_e$ | $T_e$ |
| 1/2      | 1     | 2.0195 | 509        | 2.35             | 0     | 2.0159 | 513        | 2.42             | 0     |
| 1/2      | 2     | 1.9425 | 599        | 2.80             | 8543  | 1.9396 | 599        | 2.79             | 9627  |
| 1/2      | 3     | 1.9417 | 596        | 2.75             | 19195 | 1.9397 | 597        | 2.78             | 20267 |
| 3/2      | 1     | 1.9455 | 593        | 2.76             | 9057  | 1.9438 | 595        | 2.79             | 10180 |
| 3/2      | 2     | 1.9496 | 590        | 2.76             | 20121 | 1.9480 | 591        | 2.80             | 21222 |
| 5/2      | 1     | 1.9508 | 588        | 2.76             | 9825  | 1.9493 | 589        | 2.78             | 10968 |
| 5/2      | 2     | 1.9513 | 583        | 2.75             | 21011 | 1.9499 | 584        | 2.77             | 22127 |
| 7/2      | 1     | 1.9510 | 582        | 2.74             | 10494 | 1.9496 | 583        | 2.77             | 11645 |
| ION      |       | 2.0851 | 435        | 2.74             | -9579 | 2.0823 | 437        | 2.79             | -8197 |

### 3.3 Combined potentials

Figure S13 shows the PECs for longer bond distances.

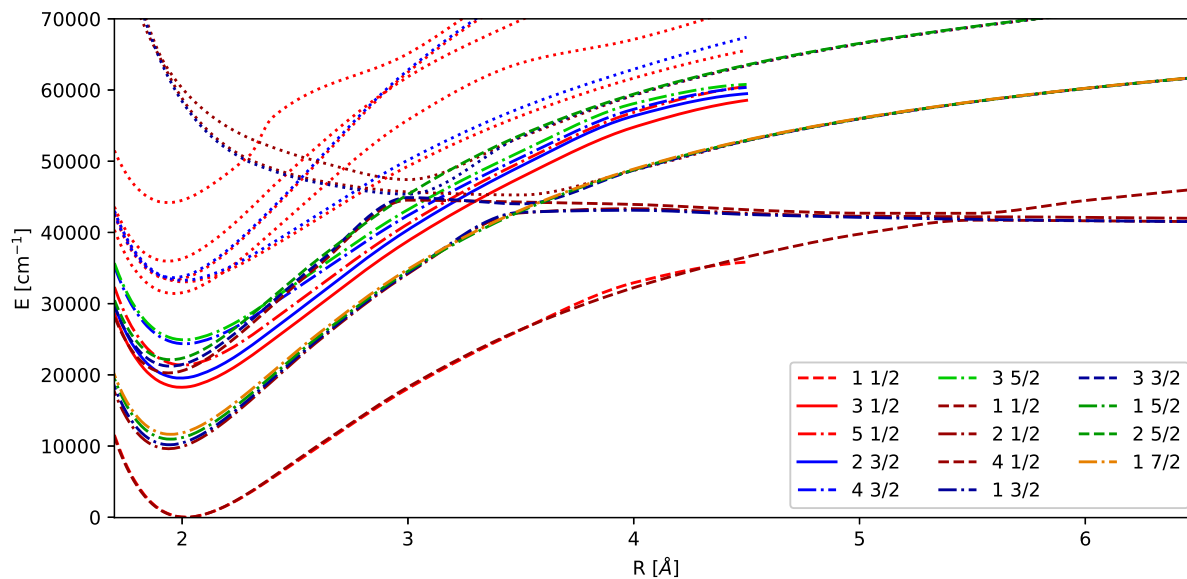

Figure S13: IHFS-CCSD PECs generated by the use of two different sectors and reference systems after extrapolation to the basis sets limit.

### 3.4 Spectroscopic quantities after mixing

We extracted the spectroscopic quantities for the adiabaticized potentials shown in the main text and listed them here.

Table S13: Spectroscopic constants for the different electronic states ( $\Omega = 1/2, 3/2, 5/2$ ) obtained by IHFS-CCSD after basis set extrapolation, results from two sectors are combined using adiabaticization with different coupling constants (C). Vibrational constant ( $\omega_e$ ), anharmonicity constant ( $\omega_e\chi_e$ ), and transition energy ( $T_e$ ), are given in  $\text{cm}^{-1}$ , the equilibrium bond distance ( $r_e$ ) in Å.

| $\Omega$ | state | C = 10 $\text{cm}^{-1}$ |            |                  |       | C = 100 $\text{cm}^{-1}$ |            |                  |       | C = 1000 $\text{cm}^{-1}$ |            |                  |       |
|----------|-------|-------------------------|------------|------------------|-------|--------------------------|------------|------------------|-------|---------------------------|------------|------------------|-------|
|          |       | $r_e$                   | $\omega_e$ | $\omega_e\chi_e$ | $T_e$ | $r_e$                    | $\omega_e$ | $\omega_e\chi_e$ | $T_e$ | $r_e$                     | $\omega_e$ | $\omega_e\chi_e$ | $T_e$ |
| 1/2      | 1     | 2.0177                  | 515        | 2.80             | 0     | 2.0177                   | 515        | 2.80             | 0     | 2.0167                    | 515        | 2.80             | 0     |
| 1/2      | 2     | 1.9397                  | 599        | 2.77             | 9618  | 1.9397                   | 599        | 2.77             | 9617  | 1.9418                    | 596        | 2.76             | 9522  |
| 1/2      | 3     | 1.9953                  | 539        | 2.61             | 18249 | 1.9952                   | 538        | 2.60             | 18247 | 1.9843                    | 533        | 2.35             | 18066 |
| 1/2      | 4     | 1.9337                  | 609        | 8.95             | 20260 | 1.9349                   | 603        | 8.61             | 20258 | 1.9654                    | 561        | 3.65             | 20160 |
| 1/2      | 5     | 2.0035                  | 586        | 0.25             | 21336 | 2.0019                   | 586        | 0.38             | 21359 | 1.9860                    | 577        | 2.10             | 22209 |
| 1/2      | 6     | 1.9644                  | 581        | 1.83             | 31417 | 1.9644                   | 581        | 1.83             | 31419 | 1.9645                    | 580        | 1.96             | 31667 |
| 1/2      | 7     | 2.0149                  | 470        | 0.14             | 33029 | 2.0149                   | 470        | 0.14             | 33031 | 2.0132                    | 472        | 0.24             | 33255 |
| 1/2      | 8     | 1.9647                  | 633        | 2.62             | 33384 | 1.9647                   | 633        | 2.62             | 33386 | 1.9656                    | 628        | 2.61             | 33633 |
| 3/2      | 1     | 1.9438                  | 594        | 2.76             | 10171 | 1.9438                   | 594        | 2.76             | 10170 | 1.9447                    | 593        | 2.76             | 10097 |
| 3/2      | 2     | 1.9921                  | 542        | 2.61             | 19543 | 1.9919                   | 542        | 2.60             | 19540 | 1.9820                    | 541        | 2.50             | 19316 |
| 3/2      | 3     | 1.9480                  | 591        | 2.77             | 21213 | 1.9482                   | 591        | 2.80             | 21217 | 1.9621                    | 580        | 3.13             | 21524 |
| 3/2      | 4     | 2.0121                  | 512        | 2.72             | 24363 | 2.0121                   | 512        | 2.69             | 24369 | 2.0059                    | 528        | 2.33             | 24897 |
| 3/2      | 5     | 2.0023                  | 473        | 1.95             | 33287 | 2.0023                   | 473        | 1.95             | 33290 | 1.9998                    | 476        | 2.25             | 33537 |
| 3/2      | 6     | 1.9608                  | 632        | 3.13             | 33644 | 1.9608                   | 632        | 3.13             | 33647 | 1.9630                    | 623        | 2.67             | 33954 |
| 5/2      | 1     | 1.9493                  | 589        | 2.75             | 10959 | 1.9493                   | 589        | 2.75             | 10960 | 1.9496                    | 588        | 2.76             | 11075 |
| 5/2      | 2     | 1.9500                  | 584        | 2.75             | 22118 | 1.9500                   | 583        | 2.76             | 22117 | 1.9542                    | 572        | 3.01             | 22014 |
| 5/2      | 3     | 2.0090                  | 515        | 2.75             | 24920 | 2.0089                   | 516        | 2.72             | 24926 | 2.0024                    | 532        | 2.38             | 25513 |

## 4 Equation-of-motion coupled cluster (EOM-CCSD)

### 4.1 Yb cation transition energies

Table S14: Transition energies for the Yb cation. Reference values have been obtained from the Nist database, the computed values were obtained for different basis sets with IP-EOM-CCSD or EA-EOM-CCSD coupled cluster.

| state               | conf          | NIST <sup>9</sup> | EA    |       |       | IP    |       |       |
|---------------------|---------------|-------------------|-------|-------|-------|-------|-------|-------|
|                     |               | E                 | 2z    | 3z    | 4z    | 2z    | 3z    | 4z    |
| $^2S_{1/2}$         | $4f^{14}6s$   | 0                 | 0     | 0     | 0     | 0     | 0     | 0     |
| $^2F_{7/2}^{\circ}$ | $4f^{13}6s^2$ | 21419             |       |       |       | 12054 | 13524 | 16092 |
| $^2F_{5/2}^{\circ}$ | $4f^{13}6s^2$ | 31568             |       |       |       | 22629 | 24139 | 26655 |
| $^2D_{3/2}$         | $4f^{14}5d$   | 22961             | 24209 | 24073 | 24060 | 32956 | 33306 | 33712 |
| $^2D_{5/2}$         | $4f^{14}5d$   | 24333             | 25457 | 25351 | 25341 | 33589 | 33865 | 34263 |
| $^2P_{1/2}^{\circ}$ | $4f^{14}6p$   | 27062             | 27780 | 27539 | 27857 | 31553 | 31938 | 32112 |
| $^2P_{3/2}^{\circ}$ | $4^{14}6p$    | 30392             | 31246 | 30954 | 31323 | 34621 | 34975 | 35147 |

### 4.2 Closed f-shell - potential energy curves

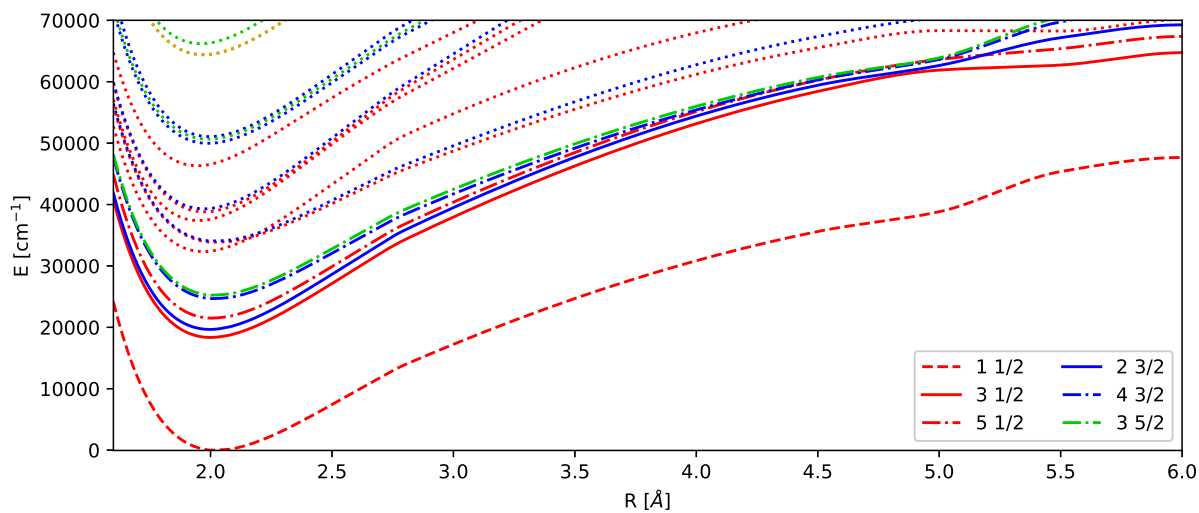

Figure S14: EOM-CCSD PECs for states from the (0h,1p) sector with a cation reference for the quadruple zeta basis sets.

Table S15: Spectroscopic constants for the different electronic states ( $\Omega = 1/2, 3/2, 5/2$ ) obtained by EOM-CCSD for the (0h,1p) sector using different basis set sizes. Vibrational constant ( $\omega_e$ ), anharmonicity constant ( $\omega_e\chi_e$ ), and transition energy ( $T_e$ ), are given in  $\text{cm}^{-1}$ , the equilibrium bond distance ( $r_e$ ) in Å.

| $\Omega$ | state | v3z    |            |                  |       | v4z    |            |                  |       | CBS    |            |                  |       |
|----------|-------|--------|------------|------------------|-------|--------|------------|------------------|-------|--------|------------|------------------|-------|
|          |       | $r_e$  | $\omega_e$ | $\omega_e\chi_e$ | $T_e$ | $r_e$  | $\omega_e$ | $\omega_e\chi_e$ | $T_e$ | $r_e$  | $\omega_e$ | $\omega_e\chi_e$ | $T_e$ |
| 1/2      | 1     | 2.0287 | 503        | 2.30             | 0     | 2.0248 | 508        | 2.57             | 0     | 2.0230 | 511        | 2.80             | 0     |
| 1/2      | 2     | 2.0040 | 525        | 2.22             | 18407 | 2.0012 | 532        | 2.52             | 18384 | 2.0004 | 536        | 2.72             | 18373 |
| 1/2      | 3     | 2.0128 | 521        | 2.27             | 21631 | 2.0093 | 527        | 2.58             | 21524 | 2.0079 | 532        | 2.78             | 21448 |
| 1/2      | 4     | 1.9718 | 513        | 8.14             | 33599 | 1.9646 | 567        | 4.96             | 32407 | 1.9726 | 593        | 0.60             | 31497 |
| 1/2      | 5     | 2.0408 | 552        | 0.10             | 34419 | 2.0334 | 510        | 0.28             | 33772 | 2.0294 | 479        | 0.29             | 33299 |
| 1/2      | 6     | 1.9652 | 580        | 2.32             | 39226 | 1.9499 | 596        | 2.33             | 37425 | 1.9405 | 607        | 2.20             | 36100 |
| 1/2      | 7     | 1.9899 | 550        | 1.95             | 43303 | 1.9753 | 575        | 2.10             | 38850 | 1.9667 | 593        | 2.19             | 35591 |
| 1/2      | 8     | 1.9482 | 577        | 2.53             | 51348 | 1.9460 | 582        | 2.56             | 46354 | 1.9456 | 584        | 2.58             | 42725 |
| 3/2      | 1     | 2.0006 | 529        | 2.23             | 19738 | 1.9979 | 535        | 2.52             | 19696 | 1.9971 | 540        | 2.72             | 19672 |
| 3/2      | 2     | 2.0273 | 496        | 2.25             | 24996 | 2.0210 | 503        | 2.56             | 24691 | 2.0177 | 509        | 2.78             | 24468 |
| 3/2      | 3     | 2.0481 | 470        | 2.30             | 34695 | 2.0237 | 480        | 2.71             | 34062 | 2.0068 | 489        | 3.03             | 33563 |
| 3/2      | 4     | 1.9862 | 549        | 1.97             | 44290 | 1.9724 | 575        | 2.13             | 39335 | 1.9646 | 593        | 2.14             | 35711 |
| 3/2      | 5     | 2.0073 | 525        | 2.10             | 60165 | 1.9900 | 550        | 2.33             | 50005 | 1.9797 | 569        | 2.45             | 42573 |
| 3/2      | 6     | 2.0096 | 539        | 2.15             | 62569 | 1.9961 | 563        | 2.39             | 51099 | 1.9881 | 581        | 2.54             | 42720 |
| 5/2      | 1     | 2.0248 | 498        | 2.25             | 25584 | 2.0181 | 507        | 2.56             | 25259 | 2.0146 | 513        | 2.80             | 25023 |
| 5/2      | 2     | 2.0085 | 523        | 2.10             | 61177 | 1.9905 | 548        | 2.34             | 50686 | 1.9796 | 567        | 2.48             | 43011 |
| 5/2      | 3     | 1.9834 | 549        | 2.24             | 75514 | 1.9711 | 569        | 2.39             | 64418 | 1.9642 | 581        | 2.34             | 56321 |
| 5/2      | 4     | 1.9526 | 583        | 2.56             | 77193 | 1.9601 | 582        | 2.24             | 66234 | 1.9659 | 583        | 2.18             | 58242 |
| 7/2      | 1     | 1.9834 | 549        | 2.24             | 75566 | 1.9712 | 569        | 2.39             | 64446 | 1.9643 | 581        | 2.34             | 56331 |
| 7/2      | 2     | 1.9499 | 582        | 2.45             | 77694 | 1.9463 | 590        | 2.48             | 80882 | 1.9006 | 708        | 45.10            | 83343 |
| ION      | 0     | 1.9485 | 596        | 2.16             | 48387 | 1.9471 | 604        | 2.02             | 48471 | 1.9471 | 609        | 1.91             | 48578 |

### 4.3 Open f-shell - potential energy curves

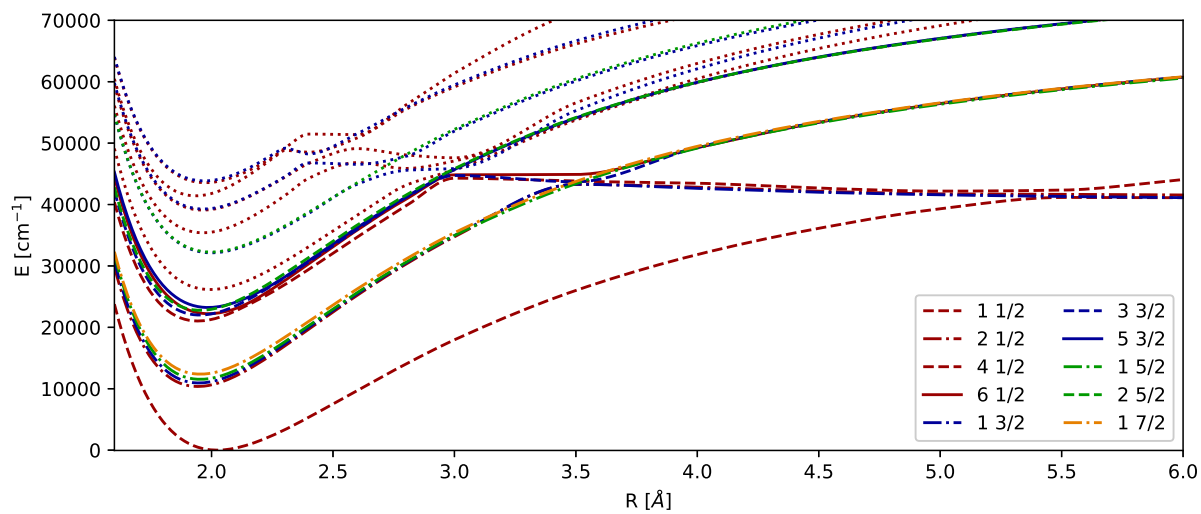

Figure S15: EOM-CCSD PECs for states from the (1h, 0p) sector with an anion reference for the quadruple zeta basis sets.

Table S16: Spectroscopic constants for the different electronic states ( $\Omega = 1/2, 3/2, 5/2$ ) obtained by EOM-CCSD for the (1h,0p) sector using different basis set sizes. Vibrational constant ( $\omega_e$ ), anharmonicity constant ( $\omega_e\chi_e$ ), and transition energy ( $T_e$ ), are given in  $\text{cm}^{-1}$ , the equilibrium bond distance ( $r_e$ ) in Å.

| $\Omega$ | state | v3z    |            |                  |       | v4z    |            |                  |       | CBS    |            |                  |       |
|----------|-------|--------|------------|------------------|-------|--------|------------|------------------|-------|--------|------------|------------------|-------|
|          |       | $r_e$  | $\omega_e$ | $\omega_e\chi_e$ | $T_e$ | $r_e$  | $\omega_e$ | $\omega_e\chi_e$ | $T_e$ | $r_e$  | $\omega_e$ | $\omega_e\chi_e$ | $T_e$ |
| 1/2      | 1     | 2.0247 | 503        | 2.27             | 0     | 2.0233 | 507        | 2.41             | 0     | 2.0250 | 508        | 2.53             | 0     |
| 1/2      | 2     | 1.9462 | 597        | 2.78             | 7380  | 1.9431 | 595        | 2.67             | 10361 | 1.9432 | 591        | 2.59             | 12568 |
| 1/2      | 3     | 1.9445 | 593        | 2.70             | 18046 | 1.9428 | 588        | 3.23             | 21029 | 1.9432 | 582        | 4.06             | 23241 |
| 1/2      | 4     | 1.9922 | 548        | 2.31             | 22306 | 1.9889 | 564        | 1.51             | 22205 | 1.9886 | 573        | 1.18             | 22147 |
| 1/2      | 5     | 1.9991 | 543        | 2.36             | 26384 | 1.9941 | 549        | 2.39             | 26151 | 1.9931 | 551        | 2.40             | 25991 |
| 1/2      | 6     | 1.9735 | 571        | 2.21             | 36936 | 1.9645 | 584        | 2.21             | 35391 | 1.9606 | 591        | 2.18             | 34280 |
| 1/2      | 7     | 1.9973 | 524        | 2.77             | 40983 | 1.9634 | 567        | 2.82             | 39091 | 1.9441 | 595        | 2.76             | 37639 |
| 1/2      | 8     | 1.9506 | 609        | 2.41             | 43943 | 1.9346 | 620        | 2.33             | 41412 | 1.9252 | 625        | 2.24             | 39575 |
| 3/2      | 1     | 1.9482 | 590        | 2.71             | 7848  | 1.9475 | 590        | 2.66             | 10931 | 1.9494 | 588        | 2.61             | 13211 |
| 3/2      | 2     | 1.9521 | 587        | 2.72             | 18941 | 1.9516 | 586        | 2.68             | 21994 | 1.9537 | 584        | 2.64             | 24251 |
| 3/2      | 3     | 1.9889 | 551        | 2.31             | 23370 | 1.9855 | 556        | 2.30             | 23227 | 1.9857 | 557        | 2.28             | 23137 |
| 3/2      | 4     | 2.0100 | 522        | 2.37             | 32680 | 1.9987 | 533        | 2.47             | 32132 | 1.9936 | 539        | 2.45             | 31734 |
| 3/2      | 5     | 2.0017 | 523        | 2.70             | 41181 | 1.9659 | 564        | 2.79             | 39262 | 1.9451 | 591        | 2.75             | 37778 |
| 5/2      | 1     | 1.9532 | 585        | 2.72             | 8588  | 1.9530 | 584        | 2.66             | 11529 | 1.9553 | 582        | 2.61             | 13703 |
| 5/2      | 2     | 1.9536 | 580        | 2.71             | 19807 | 1.9535 | 579        | 2.65             | 22768 | 1.9559 | 577        | 2.62             | 24957 |
| 5/2      | 3     | 2.0085 | 524        | 2.39             | 32839 | 1.9974 | 534        | 2.46             | 32257 | 1.9923 | 540        | 2.45             | 31834 |
| 7/2      | 1     | 1.9532 | 580        | 2.71             | 9245  | 1.9532 | 579        | 2.64             | 12373 | 1.9556 | 577        | 2.62             | 14685 |
| ION      | 0     | 2.0941 | 429        | 2.64             | -9522 | 2.0889 | 431        | 2.99             | -9713 | 2.0883 | 432        | 3.25             | -9876 |



## 4.4 Combined potentials

Figure S16 shows the PECs for longer bond distances.

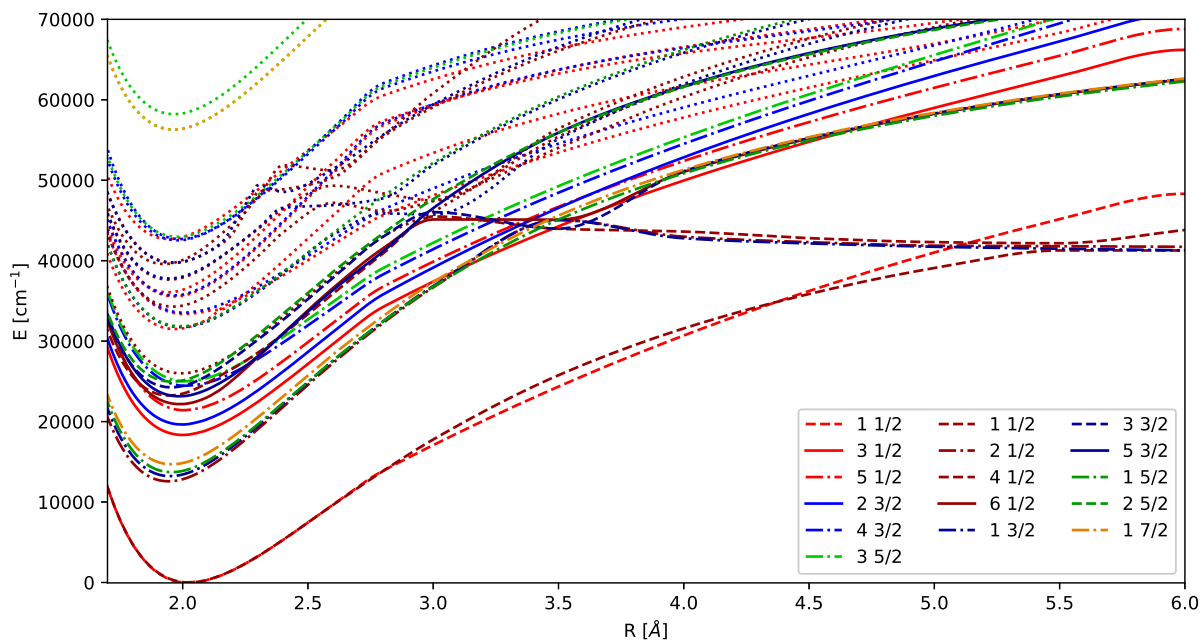

Figure S16: EOM-CCSD PECs generated by the use of two different sectors and reference systems for extrapolation to the basis set limit.

## 5 Spectroscopic parameters

Table S17 contains the complete list of calculated states, of which a selection was presented in table 7 in the main manuscript.

Table S17: Spectroscopic constants for excited states with  $\Omega = 1/2, 3/2, 5/2$ , starting from 18000  $\text{cm}^{-1}$  for different methods using the values after extrapolation to the basis set limit. Transition energy ( $T_e$ ), vibrational constant ( $\omega_e$ ), and anharmonicity constant ( $\omega_e\chi_e$ ) are given in  $\text{cm}^{-1}$ , the equilibrium bond distance ( $r_e$ ) in Å. Experimental transitions that were not assigned(n.a.) are also listed.

| $\Omega$             | method                 | state                  | configuration              | $T_e$         | $r_e$  | $\omega_e$ | $\omega_e\chi_e$ |      |
|----------------------|------------------------|------------------------|----------------------------|---------------|--------|------------|------------------|------|
| 1/2                  | KRCI <sup>a</sup>      | 3                      | $4f^{13}\sigma_{6s}^2$     | 15572         | 1.9038 | 655        | 13.57            |      |
|                      |                        | 4                      | $4f^{13}5d\sigma_{6s}^1$   | 16020         | 1.9603 | 620        | 0.08             |      |
|                      |                        | 5                      | $4f^{14}6p^1$              | 16189         | 2.0504 | 496        | 2.38             |      |
|                      |                        | 6                      | $4f^{13}5d^1\sigma_{6s}^1$ | 17350         | 1.9360 | 598        | 2.50             |      |
|                      |                        | 7                      | $4f^{13}5d^1\sigma_{6s}^1$ | 17587         | 1.9417 | 592        | 2.56             |      |
|                      |                        | 8                      | $4f^{13}5d^1\sigma_{6s}^1$ | 18675         | 1.9539 | 582        | 2.71             |      |
|                      |                        | 9                      | $4f^{13}5d^1\sigma_{6s}^1$ | 18952         | 1.9479 | 578        | 2.71             |      |
|                      |                        | 10                     | $4f^{14}5d^1$              | 19631         | 2.0552 | 490        | 2.49             |      |
|                      |                        | EOM-CCSD               | 3                          | $4f^{14}6p^1$ | 18373  | 2.0004     | 536              | 2.72 |
|                      |                        |                        | 4                          | $4f^{14}5d^1$ | 21448  | 2.0079     | 532              | 2.78 |
| 5                    | $4f^{14}6p^1$          |                        | 22147                      | 1.9886        | 573    | 1.18       |                  |      |
| 6                    | $4f^{13}\sigma_{6s}^2$ |                        | 23241                      | 1.9432        | 582    | 4.06       |                  |      |
| IHFS-CCSD            | 3                      | $4f^{14}6p^1$          | 18249                      | 1.9953        | 539    | 2.63       |                  |      |
|                      | 4                      | $4f^{13}\sigma_{6s}^2$ | 20267                      | 1.9397        | 597    | 2.78       |                  |      |
|                      | 5                      | $4f^{14}5d^1$          | 21375                      | 2.0032        | 533    | 2.73       |                  |      |
| MRCI <sup>10</sup>   |                        | $4f^{13}\sigma_{6s}^2$ |                            | 1.948         | 600    |            |                  |      |
| exp. <sup>11 a</sup> | 3                      |                        | 18106.20                   |               | 537    | 3          |                  |      |
| exp. <sup>11</sup>   | 4                      | $[18.6]_{1/2}$         | 18705.06                   |               |        |            |                  |      |

*Continued on next page*

Table S17 – *Continued from previous page*

| $\Omega$ | method             | state | configuration              | $T_e$    | $r_e$  | $\omega_e$ | $\omega_e \chi_e$ |
|----------|--------------------|-------|----------------------------|----------|--------|------------|-------------------|
|          | exp. <sup>12</sup> |       | [557]                      | 18574    | 1.9656 | 502.15     |                   |
|          | exp. <sup>12</sup> |       | [561]                      | 18699    | 1.9571 |            |                   |
| 3/2      | KRCI <sup>a</sup>  | 2     | $4f^{13}\sigma_{6s}^2$     | 16206    | 1.9331 | 711        | 8.45              |
|          |                    | 3     | $4f^{13}5d^1\sigma_{6s}^1$ | 16346    | 1.9505 | 516        | 0.80              |
|          |                    | 4     | $4f^{14}6p^1$              | 17123    | 2.0473 | 499        | 2.37              |
|          |                    | 5     | $4f^{13}5d^1\sigma_{6s}^1$ | 17693    | 1.9473 | 585        | 2.47              |
|          |                    | 6     | $4f^{13}5d^1\sigma_{6s}^1$ | 17843    | 1.9408 | 584        | 3.30              |
|          |                    | 7     | $4f^{14}5d^1$              | 24583    | 2.0669 | 470        | 2.50              |
|          | EOM-CCSD           | 2     | $4f^{14}6p^1$              | 19672    | 1.9971 | 540        | 2.72              |
|          |                    | 3     | $4f^{14}6p^1$              | 23137    | 1.9857 | 557        | 2.28              |
|          |                    | 4     | $4f^{13}\sigma_{6s}^2$     | 24251    | 1.9537 | 584        | 2.64              |
|          |                    | 5     | $4f^{14}5d^1$              | 24468    | 2.0177 | 509        | 2.78              |
|          | IHFS-CCSD          | 2     | $4f^{14}6p^1$              | 19543    | 1.9920 | 542        | 2.63              |
|          |                    | 3     | $4f^{13}\sigma_{6s}^2$     | 21222    | 1.9480 | 591        | 2.80              |
|          |                    | 4     | $4f^{14}5d^1$              | 24363    | 2.0120 | 512        | 2.73              |
|          | MRCI <sup>10</sup> |       | $4f^{13}\sigma_{6s}^2$     |          | 1.953  | 596        |                   |
|          | exp. <sup>11</sup> | 2     |                            | 19471.49 |        |            |                   |
| 5/2      | KRCI <sup>a</sup>  | 2     | $4f^{13}5d^1\sigma_{6s}^1$ | 16340    | 1.9677 | 564        | 2.42              |
|          |                    | 3     | $4f^{13}\sigma_{6s}^2$     | 17063    | 1.9302 | 635        | 1.41              |
|          |                    | 4     | $4f^{13}5d^1\sigma_{6s}^1$ | 17700    | 1.9627 | 571        | 0.93              |
|          |                    | 5     | $4f^{13}5d^1\sigma_{6s}^1$ | 18422    | 1.9451 | 584        | 3.07              |
|          |                    | 6     | $4f^{14}5d^1$              | 24744    | 2.0639 | 474        | 2.48              |

*Continued on next page*

Table S17 – *Continued from previous page*

| $\Omega$ | method             | state | configuration          | $T_e$   | $r_e$   | $\omega_e$ | $\omega_e\chi_e$ |
|----------|--------------------|-------|------------------------|---------|---------|------------|------------------|
|          | EOM-CCSD           | 2     | $4f^{13}\sigma_{6s}^2$ | 24957   | 1.95359 | 577        | 2.62             |
|          |                    | 3     | $4f^{14}5d^1$          | 25023   | 2.0146  | 513        | 2.80             |
|          | IHFS-CCSD          | 2     | $4f^{13}\sigma_{6s}^2$ | 22127   | 1.9499  | 584        | 2.77             |
|          |                    | 3     | $4f^{14}5d^1$          | 24919   | 2.0089  | 515        | 2.77             |
|          | MRCI <sup>10</sup> |       | $4f^{13}\sigma_{6s}^2$ |         | 1.954   | 590        |                  |
| n.a.     | exp. <sup>13</sup> |       | [574]                  | 19150   |         |            |                  |
|          | exp. <sup>13</sup> |       | [578]                  | 19280   |         |            |                  |
|          | exp. <sup>14</sup> |       | C <sub>1</sub>         | 23035.3 |         | 523        | 2                |
|          | exp. <sup>14</sup> |       | C <sub>2</sub>         | 23256.0 |         | 507        | 2                |
|          | exp. <sup>14</sup> |       | D                      | 26014.8 |         | 574.6      | 2.8              |

<sup>a</sup> KRCI transition energies for the  $4f^{13}$  sector were obtained by adding  $4144\text{ cm}^{-1}$ , an estimate for the energy of the lowest state in this manifold.

## 6 Frank-Condon factors (FCFs) for different methods

Frank-Condon factors are shown in figure S17 for MRCI, EOM-CCSD and IHFS-CCSD. From it, we observe a marked difference between the configuration interaction and coupled cluster results: first, the equilibrium distance and curvature are quite different, something that, in turn, change the overlap and resulting Frank-Condon factors as well as the progression of the vibrational levels.

Additionally, there is more uncertainty with regards to the position of the potential energy curves, as configuration interaction is not size consistent and we observe transition in the range from  $14000$  to  $19000\text{ cm}^{-1}$  for these states. The states are more dense in this case, which is expected as states of the  $\text{Yb}(4f^{13}[F_{7/2}^{\circ}]5d^1\sigma_{6s}^1)\text{F}$  configuration are included, which

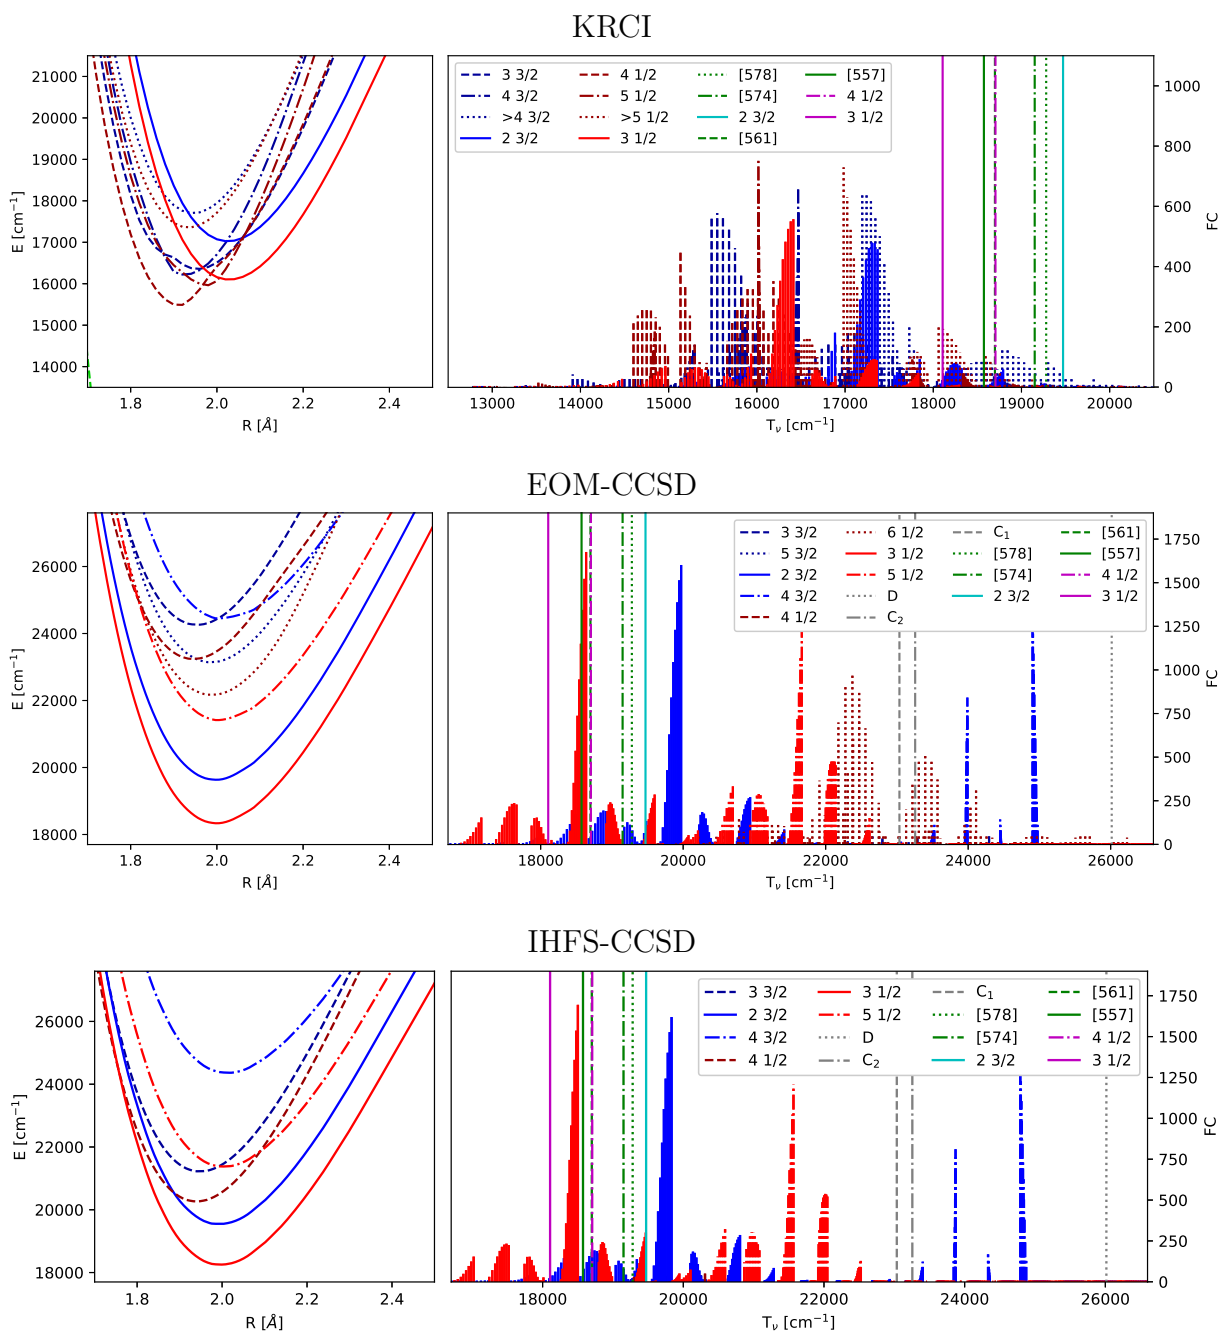

Figure S17: Frank-Condon factors obtained with the LEVEL program<sup>15</sup> by using the potential energy curves on the left, which have been obtained by different ab-initio methods. The lowest 10 vibrational levels of the ground state were used as well as the lowest 60 vibrational levels of the excited state. The experimental values have been added as straight lines.<sup>11-13</sup>

are missing in the coupled cluster descriptions.

The EOM-CCSD and IHFS-CCSD Frank-Condon factors are quite similar to each other, with the exception of the additional  $6_{1/2}$  state in EOM-CCSD, probably stemming from the contributions by (2h,1p)/(1h,2p) to the final states. The results for the  $3_{1/2}$  and  $2_{3/2}$  state are close to the experimentally observed positions, only about  $500\text{ cm}^{-1}$  too high, and show the same splitting. The transition of the  $5_{1/2}$  states are also similar in both coupled cluster treatments.

## References

- (1) Pototschnig, J. V.; Dyall, K. G.; Visscher, L.; André Severo Pereira Gomes, Electronic Spectra of Ytterbium Fluoride from Relativistic Electronic Structure Calculations. 2021; <https://arxiv.org/abs/2107.11234v1>.
- (2) Thyssen, J. Development and Applications of Methods for Correlated Relativistic Calculations of Molecular Properties. Ph.D. thesis, University of Southern Denmark, 2001.
- (3) Cox, P. A. Ionization energies of open-shell molecules in the frozen orbital approximation. *null* **1975**, *30*, 389–403.
- (4) Sikkema, J.; Visscher, L.; Saue, T.; Iliáš, M. The molecular mean-field approach for correlated relativistic calculations. *J. Chem. Phys.* **2009**, *131*, 124116.
- (5) Ilias, M.; Saue, T. An infinite-order two-component relativistic Hamiltonian by a simple one-step transformation. *J. Chem. Phys.* **2007**, *126*, 064102.
- (6) Schimmelpfennig, B. *AMFI, an atomic mean-field spin-orbit integral program*. University of Stockholm, Stockholm, Sweden; 1999.
- (7) Visscher, L. Approximate molecular relativistic Dirac-Coulomb calculations using a simple Coulombic correction. *Theoretical Chemistry Accounts* **1997**, *98*, 68–70.
- (8) Kramida, A.; Yu. Ralchenko,; Reader, J.; and NIST ASD Team, NIST Atomic Spectra Database (ver. 5.8), [Online]. Available: <https://physics.nist.gov/asd> [2017, April 9]. National Institute of Standards and Technology, Gaithersburg, MD., 2020.
- (9) Huber, K.; Herzberg, G. Constants of Diatomic Molecules. National Institute of Standards and Technology, Gaithersburg MD, 20899, 2005; (data prepared by J.W. Gallagher and R.D. Johnson, III) in NIST Chemistry WebBook, NIST Standard Reference Database Number 69, Eds. P.J. Linstrom and W.G. Mallard.

- (10) Dolg, M.; Stoll, H.; Preuss, H. Abinitio Pseudopotential Study of Ybh and Ybf. *Chemical Physics* **1992**, *165*, 21–30.
- (11) Dunfield, K. L.; Linton, C.; Clarke, T. E.; McBride, J.; Adam, A. G.; Peers, J. R. D. Laser spectroscopy of the lanthanide monofluorides: Analysis of the A(2)Pi-X(2)Sigma(+) transition of ytterbium monofluoride. *Journal of Molecular Spectroscopy* **1995**, *174*, 433–445.
- (12) Lim, J.; Almond, J. R.; Tarbutt, M. R.; Nguyen, D. T.; Steimle, T. C. The [557]-X-2 Sigma(+) and [561]-X-2 Sigma(+) bands of ytterbium fluoride, (YbF)-Yb-174. *Journal of Molecular Spectroscopy* **2017**, *338*, 81–90.
- (13) Smallman, I. J.; Wang, F.; Steimle, T. C.; Tarbutt, M. R.; Hinds, E. A. Radiative branching ratios for excited states of  $^{174}\text{YbF}$ : Application to laser cooling. *Spectroscopic Tests of Fundamental Physics* **2014**, *300*, 3–6.
- (14) Uttam, K. N.; Joshi, M. M. A New Band System of the YbF Molecule. *Journal of Molecular Spectroscopy* **1995**, *174*, 290–296.
- (15) Le Roy, R. J. LEVEL: A computer program for solving the radial Schrödinger equation for bound and quasibound levels. *Journal of Quantitative Spectroscopy and Radiative Transfer* **2017**, *186*, 167–178.
